# Supplementary material
Source: PubMed Central journal article supplement (PMC4378422)
Supplement: pnas.1421784112.sapp.pdf [file pnas.1421784112.sapp.pdf]

## Supplementary Information

# Genome-wide ancestry of 17th-century enslaved Africans from the Caribbean

H. Schroeder<sup>1,2</sup>, M.C. Ávila-Arcos<sup>1</sup>, A.-S. Malaspinas, G.D. Poznik, M. Sandoval-Velasco, M.L. Carpenter, J.V. Moreno-Mayar, M. Sikora, P.L.F. Johnson, M.E. Allentoft, J.A. Samaniego, J.B. Haviser, M.W. Dee, T.W. Stafford, Jr., A. Salas, L. Orlando, E. Willerslev, C.D. Bustamante, M.T.P. Gilbert<sup>2</sup>

<sup>1</sup>These authors contributed equally to this work.

<sup>2</sup>To whom correspondence should be addressed. E-mail: [hschroeder@snm.ku.dk](mailto:hschroeder@snm.ku.dk); [tgilbert@snm.ku.dk](mailto:tgilbert@snm.ku.dk)

## Table of Contents

|                                                                      |    |
|----------------------------------------------------------------------|----|
| 1 Samples and archeological context .....                            | 3  |
| 2 Radiocarbon dating and Bayesian analysis of radiocarbon dates..... | 4  |
| 3 DNA extraction and library preparation.....                        | 5  |
| 4 Whole genome capture and sequencing.....                           | 6  |
| 5 Sequence data filtering and mapping .....                          | 7  |
| 6 Relative sequencing/alignment error rates .....                    | 7  |
| 7 mapDamage analysis.....                                            | 9  |
| 8 Characterization of DNA preservation .....                         | 9  |
| 9 Contamination estimates .....                                      | 11 |
| 10 Determining the biological sex of the Zoutsteeg Three.....        | 11 |
| 11 Mitochondrial DNA and Y-chromosome analysis.....                  | 11 |
| 12 Genotype reference panels .....                                   | 14 |
| 13 D-statistic tests .....                                           | 15 |
| 14 Principal component analysis.....                                 | 15 |
| 15 TreeMix analysis.....                                             | 16 |
| 16 Admixture analysis .....                                          | 16 |
| Supplementary Figures .....                                          | 17 |
| Supplementary Tables .....                                           | 38 |
| References and Notes .....                                           | 44 |

## 1 Samples and archeological context

Construction work in the Zoutsteeg area of Philipsburg on the Caribbean island of Saint Martin in March 2010 revealed three articulated human skeletons. The remains were found at a depth of ca. 140-160 cm in a layer of fine loose beach sand. The layer above the burials contained several modern, 18th- and 19th-century artifacts including ceramics, red brick fragments and two unidentified iron fragments. The layer with the burials contained several other artifacts, including several pieces of late 17th-century ceramics (slipware, porcelain, salt-glaze stoneware, lead-glaze earthenware and coarse earthenware) and several glass bottle fragments including two square bottle bases with rough pontil scars (Fig. S1). In addition, two modified green stones and an almost intact conch shell were found in association with the second skeleton. Whether or not these artifacts were deliberately placed in the graves is difficult to say. However, it should be noted that pottery shards, glass bottle fragments and other seemingly insignificant objects were a common feature of African-American burial traditions, as were conch shells, especially in the Caribbean (1, 2).

Age, sex and ancestry estimates were made using standard osteological criteria, including cranial and pelvic morphology, dental eruption and wear, cranial suture and epiphyseal closure, and overall robusticity (3, 4). The remains belonged to three adults of probable African ancestry, aged between 25 and 40 years at the time of death. The first skeleton (STM1) belonged to a 25-30 year-old probable male. The skeleton was relatively well preserved with over 40% of the bones present, some of which showed clear signs of treponemal infection. Skeleton number two (STM2) belonged to an older male who would have been approximately 35-40 years old at the time of death. The skeleton was nearly complete with over 80% of the bones preserved. The skull, however, was only partially preserved, and large parts of the right side of the skull were missing. The size of the long bones suggests that this individual had been a very tall person, with a calculated stature of about 190 cm. The third skeleton (STM3) belonged to that of a female who died when she was 30-35 years of age. Her skeleton was also relatively well preserved with over 60% of the bones present. Unfortunately, however, the mandible was missing.

The most striking feature of the skeletons was that their teeth had been intentionally modified. In case of STM1, the occlusal edge of the two central upper incisors had been filed down horizontally, save for the distal extremities, which had been left and cut vertically (Fig. S2). The lateral upper incisors had also been filed on the distal side, creating a pointed shape. The lower incisors were all missing but it is possible that they had also been modified. In case of STM2, the upper incisors had been chipped on both the mesial and distal sides, resulting in a pointed shape (Fig. S3). The two left lower incisors were missing but the other two had also been modified to create a pointed shape and it seems safe to assume that all four had been originally modified the same way. For STM3, the whole mandible and both central upper incisors were missing but both upper lateral incisors were still present and had also been modified to produce a pointed shape (Fig. S4). Although the central incisors were missing, it can be assumed that they had also been filed, as it was very uncommon to modify the lateral incisors alone (5-8).

Similar types of dental modification are known from Africa but it is difficult to be more specific because the designs, especially some of the more common ones, were used by several groups (35-39). The W-shaped pattern used in case of STM2 (Fig. S3) appears to have been fairly common, as it has been reported from several parts of Africa (5-8). The design used in case of STM1 (Fig. S2) seems to have been less common but it was also used by several groups, including the Bakongo, the Loango and others (6). Unfortunately, the dentition of STM3 was incomplete so that it was not possible to identify a specific pattern. But in any case it seems clear that, as Witkin (10) rightly points out, the modifications on their own cannot be used to suggest points of origin or specific tribal affiliations.

To further investigate the origins of the Zoutsteeg Three, Schroeder et al. (11) used strontium isotope analyses, a technique that had been used previously to identify African-born individuals at other archeological sites in the Americas (e.g., 12). The strontium values for the Zoutsteeg Three were clearly distinct so as to suggest that they originated in different parts of Africa but as with previous studies (e.g., 12, 13) it was not possible to pinpoint where in Africa they had originated (11). In summary, neither the patterns of dental modification nor the isotope values could be used to suggest possible points of origin in case of the Zoutsteeg Three which is why we embarked on the genomic analysis of the remains.

## 2 Radiocarbon dating and Bayesian analysis of radiocarbon dates

We radiocarbon dated the skeletons to determine the precise date of burial. However, this was complicated by the fact that calibrating radiocarbon dates post 1500 AD generally results in broad calendar date ranges due to the shape of the calibration curve (14). To obtain more precise date ranges we incorporated the dates into a Bayesian model that included independent *prior* information regarding the burials, as well as an approximation for the turnover rate of bone collagen, i.e.  $10 \pm 5$  years. That way, we obtained a calibrated date range of 1660-1688 AD (95.4% probability) as the most likely date of burial. The Transatlantic Slave Trade Database lists only a single slaving voyage (15) that arrived in Saint Martin during that period although there were undoubtedly others that went unrecorded. Unfortunately, however, the records do not contain any information regarding the place of slave purchase, let alone the actual origins of the enslaved.

### *Radiocarbon dating*

The bone samples were dated at the W. M. Keck Carbon Cycle AMS facility of the University of California, Irvine (UCIAMS). Sample preparation and collagen extraction were done following established protocols (16). The bone samples were initially cleaned by removing adhering sediment and the outer 1 mm layer of the bone. Subsequently, approximately 200-400 mg of bone were broken up and left to demineralize in 0.5 N HCl at 5°C for 36 hr. Following a brief alkali bath in 0.1 N NaOH at room temperature to remove humates, the resulting residue was rinsed several times in ultrapure water, and then gelatinized for 12 hr at 70°C in 0.01N HCl. The gelatin solution was then pipetted into pre-cleaned Amicon Centriprep<sup>®</sup> 30 ultrafilters (30 kD MWCO) and centrifuged three times for 30 min, diluted with distilled H<sub>2</sub>O and centrifuged three more times for 30 min to desalt the solution. The filtered collagen solution was then freeze-dried and weighed to determine percent yield.

For <sup>14</sup>C dating, approx. 2.5 mg of collagen was combusted at 900°C in vacuum-sealed quartz tubes with CuO and Ag wire. The sample CO<sub>2</sub> was then reduced to graphite at 550°C using H<sub>2</sub> and a Fe catalyst, with reaction water drawn off with Mg(ClO<sub>4</sub>)<sub>2</sub>. Graphite samples were pressed into targets in Al boats and loaded on the target wheel for AMS analysis. The <sup>14</sup>C ages were  $\delta^{13}\text{C}$ -corrected for mass dependent fractionation with measured <sup>14</sup>C/<sup>13</sup>C values, and compared with samples of Pleistocene horse bone (background, >48 <sup>14</sup>C kyr BP), middle Holocene pinniped bone (~6500 <sup>14</sup>C BP), late 1800 AD cow bone, and OX-1 oxalic acid standards for calibration. Stable isotope ratios and atomic C/N ratios were determined using a Fisons NA1500NC elemental analyzer/Finnigan Delta Plus isotope ratio mass spectrometer with a precision of <0.1‰ for  $\delta^{13}\text{C}$  and  $\delta^{15}\text{N}$ . The radiocarbon and stable isotope results are listed in Table S1. All three bone samples yielded acceptable C/N ratios. Radiocarbon dates were calibrated using OxCal v4.2.3 (17) and the IntCal13 calibration curve (14).

### *Bayesian modeling of the radiocarbon results*

Radiocarbon dates are never single-year estimates but probability density functions in absolute time, usually expressed as 68% (1 $\sigma$ ) or 95% (2 $\sigma$ ) ranges. A powerful tool for analyzing such

probability functions is Bayesian statistical modeling (18). This approach allows radiocarbon data to be combined with independent chronological information, such as ordering from stratigraphy. The modeling process often generates probability functions of improved precision.

In the case of these three burials, the independent or *prior* information is fundamental to the refinement of the dating. The individual calibrated dates for each sample essentially take the form of tri-modal distributions, with some probability allocated to each of the 17th, 18th and 20th centuries. However, archaeological excavation has previously established that the burials predate the foundation of the town of Philipsburg (1735 AD). By incorporating this information in a Bayesian model using the program OxCal v4.2.3 (17), and recalculating the resulting probability estimates, it is clear that only the 17th-century portion of the original calibrations is relevant. Further information may be included in the modeling to improve the dating precision or test archaeological hypotheses. For example, it is widely accepted (e.g., 19), that the radiocarbon concentration of collagen (the fraction extracted for dating) is the result of several years metabolism. Indeed, a the bone collagen of adults in their twenties and thirties is thought to be approximately 10 years older than the individuals themselves (20). This minor offset is accounted for here using a Normal distribution ( $10 \pm 5$  years). Finally, the impact of the relative ordering of the burials can also be assessed. Fig. S5 shows the date ranges produced if they are assumed to have occurred independently over an unknown period of time, and also gives the results if they are assumed to have occurred in the same year.

### 3 DNA extraction and library preparation

#### *DNA extraction*

DNA was extracted from tooth roots, using a modified silica extraction method (21). All DNA extraction and library preparation steps were performed in dedicated clean laboratories at the Centre for Geogenetics in Copenhagen, Denmark. The samples were initially cleaned by removing any adhering sediment and the surface layer using Dremel tool fitted with a disposable rotating disc. The samples were then wiped with a tissue dipped in 10% bleach solution and UV-irradiated for 2 min on each side to further reduce the amount of surface contaminants and inhibitors. Subsequently, the tooth root was cut off and ground to a coarse powder using a ball mill. Between 200-300 mg of root powder was then weighed into 5 ml Eppendorf tubes and digested overnight at 37°C in 4 ml of an EDTA-based digestion buffer containing 0.25 mg/mL Proteinase K. The digests were then purified using a silica method as described in (21) but with the following modifications. During the binding step, we used 50 µl of silica suspension and samples were eluted in 60 µl TET buffer.

#### *Library preparation*

Thirty µl of each of the DNA extracts were built into NGS libraries using the NEBNext DNA Sample Prep Master Mix Set 2 (New England Biolabs Inc., Beverly, MA, USA) and Illumina specific adapters (22). The libraries were prepared according to manufacturer's instructions, with the following modifications. The initial nebulization step was skipped because of the fragmented nature of ancient DNA (aDNA). End-repair was performed in 50 µl reactions using 30 µl of DNA extract. The reactions were incubated for 20 min at 12°C and 15 min at 37°C, purified using QIAGEN MinElute spin columns (Hilden, Germany) and 10X PN buffer, and eluted in 30 µl EB. The adapter ligation step was performed in 50 µl reactions using 30 µl of end-repaired DNA and Illumina-specific adapters (22). The reactions were incubated for 15 min at 20°C and purified using QIAGEN MinElute columns and 5X PB before being eluted in 25 µl EB. The adaptor fill-in step was performed in a reaction of 30 µl and incubated for 20 min at 37°C followed by 20 min at 80°C to inactivate the *Bst* polymerase. The entire DNA libraries were then amplified and indexed in a 50 µl PCR reactions, containing 1X KAPA HiFi HotStart Uracil+ ReadyMix (KAPA

Biosystems, Woburn, MA, USA) and 200 nM of each of Illumina's Multiplexing PCR primer inPE1.0 (5'- AATGATACGGCGACCACCGAGATCTACACTCTTTCCCTACACGAC GCTCTT CCGATCT) and a custom-designed index primer with a six nucleotide index (5'- CAAGCAGAAGACGGCATA C GAGATNNNNNNGTGACTGGAGTTC). Thermocycling conditions were as follows: 1 min at 94°C, followed by 8-12 cycles of 15 sec at 94°C, 20 sec at 60°C, and 20 sec at 72°C, and a final extension step of 1 min at 72°C. The optimal number of cycles was determined by qPCR, as done in (22). The amplified libraries were then purified using Agencourt AMPure XP beads (Beckman Coulter, Krefeld, Germany) and quantified on an Agilent 2100 bioanalyzer (Agilent Technologies, Palo Alto, CA, USA) run in High Sensitivity mode.

The remaining 30 µl of the DNA extracts were also built into Illumina libraries using a single-stranded library preparation protocol that has been specifically designed for the sequencing of ancient or damaged DNA (23). The libraries were prepared as described in (23) but without first removing deoxyuracils.

As expected, 'shotgun' yields were consistently higher for the libraries prepared with the single-stranded method than those prepared with NEB's NEBNext library preparation kit (see Tables S2 and S3). This is mainly due to the fact that the single-stranded method is entirely devoid of purification steps that are an integral part of NEB's library preparation protocol. Further, the single-stranded method is able to incorporate DNA molecules with single-strand breaks into libraries, which tend to be lost with the double-stranded method, as described in (23). This is also reflected in the shorter average read length for the single-stranded libraries (see Table S3).

#### 4 Whole genome capture and sequencing

We enriched the endogenous component of the three double-stranded and the three single-stranded libraries using two different whole genome target enrichment schemes. Both methods make use of biotinylated RNA probes transcribed from genomic DNA libraries to capture the human DNA in the aDNA libraries. The first method, which we refer to as WISC (for Whole Genome In Solution Capture), was carried out as described in (24) using homemade biotinylated RNA probes. For the second capture experiment, we used the MYbait Human Whole Genome Capture Kit (MYcroarray, Ann Arbor, MI). The libraries were captured according to manufacturer's instructions (25). The captured libraries were amplified for 10-20 cycles using primers IS5 (5'-AATGATACG GCGACCACCGA) and IS6 (5'-CAAGCAGAAGACGGCA TACGA) and the same PCR set-up conditions as above. Subsequently, the libraries were purified using Agencourt AMPure XP beads, quantified using an Agilent 2100 bioanalyzer, pooled in equimolar amounts, and sequenced on six lanes of an Illumina HiSeq 2000 run in 100 SR mode. Base-calling was performed using the Illumina software CASAVA 1.8.2.

The sequencing results for both types of libraries, before and after capture, are listed in Tables S2 and S3. Whole genome capture led to a significant gains in library yields overall, although we obtained slightly better results using MYbait's Human Whole Genome Capture Kit (25) than WISC (24). Further, it is worth pointing out that both whole genome target enrichment methods performed better on double- than on single-stranded libraries. For double-stranded libraries we achieved up to 6-fold enrichment with MYbait's Human Whole Genome Capture Kit (25) and up to 4-fold enrichment using WISC (24). In contrast, for the single-stranded libraries maximum enrichment was only 2-fold. This difference can be explained by the fact that hybridization-based capture methods, like those employed here, bias against the shorter fragments that are present in single-stranded libraries. This is reflected in the dramatic increase in average read lengths after capture. We obtained similar results with a larger set of samples (26).

## 5 Sequence data filtering and mapping

We used AdapterRemoval (27) to trim adapter sequences on the 3' end of single end reads and to exclude adapter dimers, low quality stretches and N's at the ends of reads. The program was run in default mode, allowing for up to three mismatches between reads and the adapter sequence. Filtered fastq files were then mapped to the human reference genome version hg18 and hg19 but replacing the mitochondria with the revised Cambridge Reference Sequence (rCRS). Mapping was done using BWA version 0.7.5a-r405 (28) keeping only reads with mapping quality  $\geq 30$ . Clonal reads were removed using SAMtools' (29) rmdup function, and reads reported as having alternative mapping coordinates discarded by controlling for XA, XT and X0 tags. Endogenous content was estimated dividing the number of reads retained after filtering by the total number of trimmed reads. Bam files from different runs were merged using SAMtools (29) merge. MapDamage2 (30) was used to generate fragmentation and damage plots (see Fig. S7) and to rescale the quality of bases that had a mismatch to the reference likely derived from damage (see also section 7).

### *Filtering damaged reads using PMDtools*

To assess the effect of potential contamination on the results, we used PMDtools (31) to filter bam files and retain only reads showing signs of aDNA damage. We only retained reads with a pmd (post-mortem damage) score  $\geq 3$  and intersected them with the reference panel (see section 12) to assess if the PCA displayed the same clustering of the samples as with the unfiltered set (see section 14). Following filtering we retained 58,078, 59,994, and 103,464 reads for STM1, STM2, and STM3, respectively. The results of the PC analysis restricted to damaged reads only are shown in Fig. S18.

## 6 Relative sequencing/alignment error rates

We estimated overall error rates (sequencing errors or post-mortem damage) by two different methods: 1) by using an approach similar to the one used by Reich et al. in (32) and 2) by making use of the Y-chromosome sequence data obtained for STM1.

### *Overall and type-specific error rate estimates*

The first method makes use of a high-quality human genome and the chimpanzee sequence as an outgroup and works on the assumption that any given human sample should have on average the same number of derived alleles compared to the chimpanzee sequence. The numbers of derived alleles are counted from the high quality genome and it is assumed that any excess of derived alleles (compared to the high quality genome) observed in our sample is due to errors. Since the high-quality genome has errors as well, the estimated error rate can roughly be understood as the excess error rate relative to the error rate of the high quality genome. Overall error rates were estimated using a method of moments estimator, while the type specific error rates were estimated based on a maximum likelihood approach as described in (33).

We used NA12778 from the 1000 Genomes Project (34) as the high-quality genome and the chimpanzee genome (pantro2 from the hg19 multiz46) to determine the ancestral allele. The high quality genome was filtered with minimum base quality 35 and minimum mapping quality 35. For STM1, STM2, and STM3, we removed all reads with a mapping quality below 30 and all bases with a quality score below 20 (see section 5).

The estimated error rates are shown in Figure S6. Each bar represents a type-specific error. Overall error rates are 0.3%, 0.6%, and 0.3% for STM1, STM2, and STM3, respectively. These estimates are ca.10 times higher than those reported for modern genomes but they are comparable to previously reported error rates for other ancient genomes including the Siberian Mal'ta genome (0.3% overall) (35) and the Native American Anzick genome (0.8%) (36). The main reason for

the increased error rates in ancient genomes is the expected increase C→T and G→A transitions cause by ancient DNA damage (see section 7). Indeed, when excluding C→T and G→A errors, the average error rate of the ancient genomes is comparable to those of modern genomes (e.g., 34).

#### *Leveraging the Y-chromosome to estimate the error rate*

Upon identifying the point of divergence of STM1's Y-chromosome lineage from the known phylogeny (see section 12), we gained an expectation for both the genotypes STM1 carried across the vast majority of known variant sites and for the number of derived alleles he likely carried at unknown sites of variation. We leveraged this information to empirically estimate the genotype error rate, where we define an error as any call that does not match the true genotype of STM1. These include both sequencing errors and DNA damage—mutations that have arisen due to post-mortem deamination events.

Elsewhere in the genome, there is no ground-truth. Each locus has its own genealogical tree, and any locus within an individual has the potential to diverge from haplotype reference panels or to represent a previously unobserved recombinant haplotype. Consequently, we cannot know with certainty what the genotypes “should” be at known sites, nor how many novel variants to expect. In contrast, the entire length of the Y chromosome constitutes a single locus with a single genealogy. Once we assign an individual lineage to its place in the phylogeny, we know with great precision what the individual's genotype “should” be from the point of departure from the known tree all the way back to the root, notwithstanding the modest effect of reversion mutations. Furthermore, based on the height of the tree, we can reasonably estimate the number of novel mutations to expect. We can use this information to construct an empirical estimate of the genotype error rate.

The high-quality human reference sequence was constructed primarily of BAC clones derived from a single individual, RP11. This individual carried the R1b1a-M269 haplogroup, so we expect the STM1 genotype to match the reference/derived allele for all SNPs from the root down to the branch upon which R1b-M343 arose (Fig. S17). Furthermore, the genotype should match the non-reference/derived allele for SNPs on the R1b-V88 branch. Because the bifurcation downstream of the V88 branch is the last point of phylogenetic certainty, we do not know which allele STM1 should have carried from this point to the tip of the tree. However, by comparing to higher coverage R1b1a-M269 lineages of (37), we can estimate that STM1 carried approximately 69 additional non-reference alleles amongst all 9,988,118 callable (i.e., post site-level quality control) sites defined by (38).

We defined a list of coordinates according to three criteria. First, we used data from the UCSC Table Browser (39) and the National Center for Biotechnology Information (NCBI) Nucleotide database (40) to construct a BED file indicating the library source of each stretch of the Y chromosome, and we restricted to the RP11 regions. Second, we used BEDTools (41) to restrict to regions deemed callable in (38) and analyzed in (42). Finally, we considered the subset of these sites for which we had STM1 sequencing data. There were 1,431,890 sites for consideration, and 1821 genotypes did not accord with expectation, as defined above. We estimate that 10 ( $69 \cdot 1.43 / 9.99$ ) were genuine singletons and that the remaining discordances were sequencing errors or post-mortem mutations. Thus, we measured the empirical error rate to be approximately 1.3 errors per 1000 sites (0.13%). Amongst the 1821 mismatches, 1088 (59.8%) were C→T or A→G, whereas just 39.3% of SNPs on the internal branches of the Y-chromosome phylogeny (38) are C→T or A→G.



## 7 mapDamage analysis

Bam files were processed using mapDamage2 (30) to generate fragmentation and nucleotide misincorporation plots and to rescale the quality of bases that had a mismatch to the reference likely to be derived from damage. The double-stranded libraries all showed the characteristic damage patterns of ancient DNA libraries (Fig. S7) with sample STM2 showing a slightly higher frequency of damaged sites, reaching 13.2% at the 5' end of reads. The single-stranded libraries also showed the characteristic damage patterns but in contrast to the double-stranded libraries the same substitution pattern was observed at both the 5' and the 3' ends of the DNA molecules (Fig. S7). As observed previously (43), the excess of G→A substitutions seen at the 3' ends of DNA molecules in most aDNA libraries prepared with the double-stranded method are an artifact of the blunt-end repair step during which 3' overhangs (carrying deaminated cytosines) are removed and 5' overhangs are complemented resulting in G→A substitutions on the opposite strand. In contrast, the single-stranded protocol produces the same C→T substitution pattern at both ends, as there is no end-repair step (44). The libraries built with the single-stranded method also exhibited a higher proportion of damaged reads (Fig. S7), reaching 23.2% at the 5' end of reads for STM2. This pattern is consistent with recovering a larger fraction of shorter, damaged reads that are not captured when using the double-stranded method.

## 8 Characterization of DNA preservation

The ability to successfully isolate aDNA is highly sample dependent. Most aDNA studies (e.g., 35, 36) are conducted on well-preserved samples from permafrost or temperate environments, which are known to preserve DNA better than hot and humid environments. With average temperatures around 30°C the Caribbean presents a particularly challenging environment for aDNA studies. It was, therefore, not surprising that the three samples analyzed in this study yielded comparatively low amounts of endogenous DNA despite their relatively young age. However, the endogenous DNA contents varied substantially between samples, with values ranging from 0.3 to 7.6% before capture. One of the samples (STM2) in particular yielded consistently lower endogenous DNA contents than the other two irrespective of the library preparation method used (see Tables S2 and S3). Since the burials were found closely together and also appear to be of the same age, the question arose as to why STM1 and STM3 were so much better preserved than STM2. We therefore investigated the molecular preservation of the samples in greater detail using fragment length distributions and metagenomic analysis. The results of these two analyses are being discussed below.

### *Metagenomic analysis*

DNA degradation is known to be partly caused by the action of bacteria in the burial environment (45). Differences in the bacterial profile between samples might therefore explain differences in preservation. To reconstruct the bacterial profile of the samples, we analyzed the non-human shotgun reads using the software package MG-RAST (46). Reads with length of 70 bp or more of each library were uploaded to the MG-RAST servers. The pipeline options in the upload step that were used are dereplication, screening for Homo sapiens NCBI v36, dynamic trimming with options 15 for the lowest phred score that will be counted as a high-quality base and 5 for the minimum number of bases below the previous quality mentioned. In the analysis step, the best hit classification method was chosen to get the organism abundance, using M5NR as database with a maximum e-value cut-off of 1e-5, minimum % of identity of 70 and minimum alignment length of 40 bp. The results of the analysis are shown in Fig. S8. There were no obvious differences in the bacterial profiles between samples that could explain the difference in preservation. The plots were made with KronaTools-2.4 (47).

### *Fragment length distributions and molecular decay rates*

To further investigate the molecular preservation of the samples analyzed in this study, we generated read length distributions of the human (mapped) reads (Fig. S9). In ancient samples there usually is a negative correlation between the number of DNA molecules and their length (48). This is an effect of the post mortem fragmentation of DNA, leaving few long DNA fragments and many short ones. For all three samples a large proportion of the DNA fragments proved to be longer than 94 bp, resulting in a large peak at maximum length. This peak is a methodological artifact as we only sequenced to a length of 94 bp (100bp with 6 bp index sequence subtracted). When excluding this peak, a clear molecular decay pattern emerges for STM2 but not for STM1 and STM3 where longer fragments keep increasing in numbers (Fig. S9). For STM2 we observe an initial increase in frequency towards longer fragment lengths before it drops off. The initial increase is an artifact of the DNA extraction (and presumably also the library build) being less efficient at retaining short molecules (49). When examining only the declining part of the fragment length distribution we were able to fit an exponential decay function for both the nuclear ( $R^2 = 0.96$ ) and mtDNA ( $R^2 = 0.64$ ) (Fig. S10).

Deagle et al. (50) showed that the decay constant ( $\lambda$ ) in this exponential relationship represents the damage fraction (i.e. the fraction of bonds in the DNA backbone being broken). By solving the equation for STM2's nuclear and mtDNA respectively (Fig. S12), we retrieved DNA damage fractions ( $\lambda$ ) of 1.4% and 1.2% (Table S4), which corresponds to an expected average fragment length of 71 bp and 83 bp for nuclear and mtDNA respectively. The difference between mt and nuclear DNA is in line with previous findings, which suggest that mtDNA is being fragmented at a slower rate than nuclear DNA (48). This could be because of the circular structure of mtDNA or because mtDNA is better protected behind the double membranes of mitochondria.

It has been shown (48) that post mortem DNA fragmentation can be described as a rate process, and that the damage fraction ( $\lambda$ , per site) can be converted to a decay rate ( $k$ , per site per year), when the age of the sample is known. Here we assume an age of 340 years based on radiocarbon dating (see section 2). The corresponding decay rates ( $k$ ) are listed in Table S4. We also calculated the molecular half-life ( $t_{1/2} = \ln 2/k$ ) for STM2 to 169 and 197 years for a 100 bp nuclear DNA and mtDNA respectively (Table S4). With the decay rate observed in STM2, it would take 971 years post mortem (of which c. 340 years have already passed) for the average fragment length of the DNA molecules to be reduced to 25 bp, which is below the length of what we can bioinformatically identify as human DNA, and hence use in genomic analyses.

This rate of decay is much faster than those reported for much older samples (see Table S4) including a 7,000 year-old sample from Spain (51) and 12,800 year-old sample from North America (36) underlining the adverse effects of the Caribbean climate on DNA preservation. The much better preservation for the samples from Europe and North America can almost certainly be ascribed to low burial temperatures, estimated to average between 4-8°C for the two sites respectively (Table S4) compared with the >25°C for Saint Martin.

Curiously, STM1 and STM3 appeared to be much better preserved than STM2. It is generally accepted that the main factors determining the molecular preservation of an ancient sample is its age and the temperature at which it has been preserved (52, 53). Intuitively, this would suggest that STM1 and STM3 are either younger than STM2 or have been exposed to lower burial temperatures. Neither of these two explanations seems to apply, since the remains were buried together and also appear to be of the same age (see section 2). However, it should be noted that given the very fast rate of DNA decay estimated for STM2, even subtle differences in age, perhaps not identified within the accuracy of radiocarbon dating, would result in significant differences in average fragment lengths. All else being equal, the only obvious difference between the burials was that STM2 was found at greater depth, closer to the water table, which

might well explain the difference in preservation as the presence of water is also known to adversely affect DNA preservation (52).

## 9 Contamination estimates

### *Probabilistic-based method for estimating contamination using mtDNA reads*

To estimate contamination, we used a previously described method (54) that generates a moment-based estimate of the sequencing error rate and a Bayesian-based estimate of the posterior probability of the contamination fraction. To prepare the data for this method, we first generated a mtDNA consensus sequence for each sample. To do so we mapped the reads for each sample to the rCRS (55) and called the consensus using SAMtools (29). We inspected the consensus visually using Tablet (56) and then used BWA version 0.7.5a-r405 (28) to map the data to the whole nuclear genome (hg18) as well as to the corresponding consensus mt sequence. We only retained reads that mapped to the consensus mt with a mapping quality  $>30$ , and excluded reads with potential alternative mapping coordinates to the nuclear genome by controlling for XT, XA and XO tags. This has the effect of reducing the number of reads that map to the mitochondrial genome as well as to nuclear copies of mitochondrial genes (“numts”). We ran then three chains of 50,000 iterations for the Monte Carlo Markov Chain and discarded the first 10,000, as was done in (57). We assessed convergence of the chain by visualizing the potential scale reduction factor (PSRF) and verifying that the median of PSRF is below 1.01 for all cases (57, 58). Results are shown in Table S5. The maximum a posteriori probability for the contamination rates for all three samples are all below 1% (Table S5). Given these low estimates together with the high mt genome coverage, the chance of a mis-called base in any of the three consensus sequences is vanishingly low.

## 10 Determining the biological sex of the Zoutsteeg Three

We determined the biological sex of the Zoutsteeg Three by comparing the number of high-quality Y-chromosome reads to those mapping to both sex chromosomes. The relationship between the two can be expressed as a ratio ( $R_Y$ ) as previously described (59). We then compared this ratio to those obtained for seven modern individuals of known sex, including three males and four females. The mean  $R_Y$  ratio for the females was  $\sim 0.0022$  and  $\sim 0.09$  for the males. In addition, we also calculated the  $R_Y$  ratio for three previously published ancient genomes including the Australian Aborigine (60), the Saqqaq (61), and the Mal'ta individual (35). Lastly, we calculated the  $R_Y$  for the three Zoutsteeg individuals. The analysis was restricted to reads with a mapping quality of 30 or higher.

The results of the analysis are shown in Fig. S11. For STM1 and STM2 the  $R_Y$  ratio was 0.102 and 0.093, respectively. These  $R_Y$  values are well over the conservative threshold of 0.075 for males, allowing confident assignment as males in both cases. The ratio for STM3 was 0.024. Although this  $R_Y$  value lies above the assignment threshold defined by Skoglund *et al.* (59) as 3 standard errors from the mean we note that the value falls much closer to the female than to the male range and conclude that the biological sex of this individual is indeed female, in agreement with the morphological data (see section 1).

## 11 Mitochondrial DNA and Y-chromosome analysis

### *Mitochondrial DNA Haplogroups*

To determine the mitochondrial DNA (mtDNA) haplogroups of the Zoutsteeg individuals we first recovered reads mapping to the revised Cambridge Reference Sequence (rCRS, NC\_012920.1) (55) from the bam files (see section 5) and generated consensus sequences using SAMtools/BCFtools version 0.1.19 (29). We also generated a list of variants for each individual,

using a minimum depth of 10. Indels and hotspot mutations were excluded from analysis. Haplogroups were determined using HaploGrep (62). Lastly, we used mtPhyl (<http://eltsov.org>) to build a maximum parsimony tree to illustrate the position of the three mitogenomes on the mtDNA phylogeny (Fig. S12).

Using this approach the three mtDNAs could be assigned to haplogroups L3b1a, L3d1b2 and L2a1f, respectively. Haplogroup L3b1a is found at very high frequency in the Lake Chad Basin (63) but it also occurs in other parts of sub-Saharan Africa, although at lower frequencies (64-71). Haplogroups L3d1b2 and L2a1f are found at similar frequencies all across sub-Saharan Africa (64-71), as a result of several thousand years of population movements (e.g., the Bantu migrations) and continued gene flow, and it is therefore not possible to trace them to a particular region or population within modern-day Africa (72-74).

#### *Y-chromosome Haplogroup for STM1*

To classify the Y-chromosome haplogroup of STM1, we assembled a panel of phylogenetically informative SNPs, with emphasis on those lineages previously reported to occur at appreciable frequencies within Africa. First, toward the root of the tree (Fig. S13), we included all SNPs specific to haplogroups A00, A0-T, A0, A1, A1a, A1b, A1b1, and BT, as listed in the database maintained by the International Society of Genetic Genealogy (<http://www.isogg.org/>). Second, to probe the internal branches of the tree, we included all SNPs specific to haplogroups B, CT, E, F, HIJK, K, K(xLT), and P, as described in a study of 69 globally diverse Y-chromosome sequences (37). Finally, we utilized data from 1204 Sardinian sequences (42), restricted to coordinates deemed callable in (37), to identify SNPs specific to the roots of haplogroups J and T and to all hg R branchings leading to and descending from R1b-V88.

We formulated the haplogroup classification question as a decision tree and observed (Fig. S13): (i) exclusively ancestral alleles within paraphyletic “A” (haplogroups A00, A0, A1a, and A1b1), as well as in haplogroups B, E, J, and T; (ii) exclusively derived alleles along the path leading to R1b, which includes A0-T, A1, A1b, BT, CT, CF, F, HIJK, IJK, K(xLT), P, R, R1, and R1b. Within R1b, the STM1 lineage was ancestral for all R1b1a-M269 SNPs and derived for 4 of the 5 R1b1c-V88 SNPs for which sequencing data were available. The one anomalous SNP, at hg19 coordinate 18,685,985, had been assigned to this clade on the basis of just two observations amongst 29 individuals, thus rendering the SNP itself suspect. Therefore, we could definitively classify STM1 as a descendant of R1b1c-V88, despite the fact that no sequencing data were available for the V88 SNP itself.

Downstream of R1b1c-V88, there are two main subgroups in (42). A cluster of 18 individuals represents a lineage we refer to as “R1b1c-V88\*,” and the remaining 11 represent R1b1c3-V35, which ISOGG currently labels “R1b1c2.” We observed 7 ancestral alleles amongst 7 R1b1c-V88\* sites for which STM1 had data, and we observed 5 derived and 9 ancestral alleles on the R1b1c3-V35 branch. Upon diverging 5/14 of the way down this branch, the STM1 lineage parts company with fully-sequenced Y chromosomes of the current literature.

No sequencing data were available for the V35 mutation, but this SNP most likely arose subsequent to the split, as Cruciani *et al.* (75) observed it just twice in a survey of 5326 Y chromosomes that included more than 1800 individuals from 69 African populations, and both carriers were Italian. This leaves two other known subgroups of R1b1c-V88, those defined by V69 and those that carry the two-base insertion, M18. Unfortunately, no sequencing data were available at either site. Because M18 was only observed in a single Corsican and V69 was present in about one third of the Central African R-V88 lineages, we suggest that STM1 most likely claims affinity to either R-V69 or to another, as yet uncharacterized, branch of the R-V88 subtree.

Our Y-chromosome haplogroup classification is robust to three potential pitfalls. First, because genotypes were called directly from the sequencing read data, there was no opportunity for reference bias to affect the classification. Furthermore, reference bias could not explain the clear affinity to V88. Second, since the V88 lineage is almost entirely confined to Africa, modern contamination is extremely unlikely to have affected the analysis. Third, the haplogroup classification holds when we remove SNPs that could potentially have arisen due to a post-mortem deamination event (C→T or G→A) and confine the analysis to the ten remaining types of mutation (Fig. S14).

Haplogroup R1b is more commonly known as the predominant haplogroup of Europe, but European R1b sequences primarily belong to the R1b1a2-M269 sublineage. Though R1b is, on the whole, quite rare in Africa, R1b1c-V88 occurs at high frequency in the central Sahel, likely the result of an Asia-to-Africa back-migration in prehistory (75). The lineage occurs principally amongst Chadic-speaking populations, rising to 95% in one population of Northern Cameroon and dropping precipitously down to 0.0–4.8% in populations of Southern Cameroon. Thus, the paternal inheritance of STM1 strongly supports a homeland near the meeting-points of Cameroon, Nigeria, Niger, and Chad.

#### *Divergence time of the STM1 Y-chromosome lineage*

Upon merging STM1 data with related modern Y-chromosome sequences, we estimated a split-time of roughly 8500 years between the STM1 lineage and the closest fully sequenced Y chromosomes currently in the literature, a cluster of eleven R1b1c3-V35 sequences reported in a sample of 1204 Sardinians (42). To do so, we estimated the length of time between the STM1-lineage divergence and the emergence of R1b, and then we compared this interval to the age of R1b (Fig. S17).

Underhill *et al.* (37) report two R1b1a-M269 Y-chromosomes sequenced to sufficiently high coverage (20.1x and 8.4x) that missingness was kept to a minimum. By comparing these sequences to a number of high-coverage flow-sorted R1a sequences and suitable outgroup lineages also reported therein, we can estimate the mean number of mutations accumulated since the emergence of R1b. They report 126 SNPs shared amongst their R1b lineages, however because the study did not include R1b1c-V88, these 126 include SNPs shared with R1b1c-V88 (branch 1 in Fig. S17) as well as SNPs specific to R1b1a-M269 (branch 2). There were an average of 62.5 SNPs on each side of the split between the two higher coverage samples (branches 3 and 4). Using the mutation period reported in (38), 122 years per mutation, 188.5 accumulated mutations (126 + 62.5) equates to approximately 23.0 kya for the age of R1b.

Francalacci *et al.* (42) report a cluster of 29 R1b1c-V88 lineages from Sardinia. Though the terminal branch lengths from this study must be viewed with caution due the low-pass sequencing approach, the internal branches had high effective coverage due to the superposition of multiple sequences. Consequently, we can regard internal branch lengths with confidence. Specifically, they report 30 SNPs on the R1b-M343 branch shared by R1b1a-M269 and R1b1c-V88 (branch 1), 51 exclusive to the 29 R1b1c-V88 lineages (branch 5), and 62 SNPs on the branch shared by 11 R1b1c3-V35 lineages (branches 6 and 7). Based on the subset of 14 sites for which we have sequencing data, we infer that 5/14 of these 62 (~ 22.1) were carried by STM1 (branch 6). Consequently, approximately 103.1 (30 + 51 + 22.1) SNPs accumulated between the emergence of R1b and the time when the STM1 lineage diverged from R1b1c3-V35. Because this study was based on 8.97 Mb of sequence, whereas that of Underhill *et al.* (37) analyzed 10.35 Mb, we must scale the mutation period by a factor of 1.154. Thus, we estimate that this interval corresponds to 14.5 ky (103.1 SNPs · 1.154 · 122 years/SNP). Consequently, we conclude that it was approximately 8.5 kya that the Y-chromosome lineage carried by STM1 diverged from that carried by the 11 Sardinians.

## 12 Genotype reference panels

### *Overlap with genotype data from the HGDP reference panel*

We obtained the HGDP genotype data from the HGDP website (<http://www.hagsc.org/hgdp/>). SNPs were reported in the forward strand and their coordinates are reported with respect to hg18. The original dataset includes 1045 individuals from 52 populations, however we restricted our analyses to 854 unrelated individuals in this dataset following recommendations in (76). Before merging with aDNA sequence data, we randomly sampled one allele at each site and for each individual in the reference panel and made such site homozygous for the drawn allele, as described in (77). This was done in order to mimic the random sampling process observed in low-depth aDNA reads.

We retrieved the alignment information from the bam files of the ancient samples at the sites present in the genotype file. This was done using SAMtools (29) mpileup and specifying the sites of interest with the `-l` option to only output the alignment information in mpileup format at each of those sites. When covered, most sites had a single read, if the queried base had a quality above 20, then such base was considered and reported as an homozygous genotype at that site. For the few cases where more than one read covered the queried site, a random read was selected among those covering the site that had a base quality above 20. The drawn base was also turned into a homozygous genotype as in the single read case. For each STM individual, the ancient genotypes were merged with the modern reference genotypes using PLINK (78). This resulted in merged datasets with 162,488, 48,461 and 262,613 SNPs for STM1, STM2 and STM3, respectively.

We generated a second merged dataset for each sample by applying an additional filter. Namely we excluded sites in which the ancient alleles could potentially represent a change caused by deamination in the ancient nucleotide (i.e. G/A SNPs when the observed ancient base is A, and C/T SNPs when the observed base is T). By applying this filter the number of sites decreased to 104,234, 31,039 and 167,543, for STM1, STM2 and STM3, respectively. Principal component analysis (PCA) was then performed for each of these datasets as well as for the PMD filtered bam files (as described in section 14).

### *Overlap with Bryc et al.'s African data set*

For the more fine-scaled analyses, we used a previously published dataset (79) consisting of 146 African individuals genotyped on the Affymetrix GeneChip Human Mapping 500K array set. The dataset includes individuals from 11 different African populations including: Bamoun (20), Brong (8), Bulala (15), Fang (18), Hausa (13), Igbo (17), Kaba (16), Kongo (9), Mada (12), Fulani (13) and Xhosa (5). In addition, the dataset includes 57 Yoruba individuals from the HapMap Project (79, 80), adding to a total of 203 individuals covering 351,753 SNPs. Sampling locations can be seen in Fig. 1B and more detailed information about the dataset can be found in the original publication by Bryc *et al.* (79).

Prior to merging with low-depth sequence data, we applied the following filters to this combined genotype data set:

- i) To avoid strandness issues when merging with sequence data, all monomorphic as well as A/T G/C SNPs were removed from the dataset. For the remaining sites, the strand orientation was identified by querying the base from the reference genome and all sites reported in the negative strand were flipped to the positive strand.
- ii) We removed two Hausa individuals (NGHA017 and NGHA024) from the dataset as they fell outside the Hausa cluster.
- iii) Because of low depth, most sites overlapping between genotype and ancient sequence data are expected to be covered by only one read. We tried to mimic this characteristic in the genotype

dataset by randomly sampling one allele at each site and for each individual and making the site homozygous for the drawn allele, as done in (77).

After filtering we retained 294,651 sites in 201 individuals. The filtered genotype data was then merged with the low-depth sequence data, as described above for the HDGP dataset. The merged data sets consisted of 73,926, 21,819, and 119,140 SNPs for STM1, STM2 and STM3, respectively.

### 13 D-statistic tests

We used D-statistics as previously described (82) to determine the relationship between the Zoutsteeg Three and a set of 11 previously published high coverage genomes from different worldwide populations (17). For each of the Zoutsteeg Three, we calculated D-statistics of the form:

$D(\text{chimp, STM; Yoruba, X})$

with X representing all modern human genomes other than Yoruba. The expected value for this configuration is  $D=0$  if Yoruba and population X are equally closely related to the one of the Zoutsteeg Three (STM). If the Zoutsteeg individual is more closely related to Yoruba, the statistic is expected to be negative, while it will be positive if individual X is more closely related. By analyzing all configurations with the modern individuals X in turn, we are therefore testing whether the Zoutsteeg individuals are more closely related to any modern individuals than to Yoruba. The significance of the deviation from  $D=0$  was assessed by calculating a Z-score from a block jackknife as previously described (82), using a block size of 5 MB.

We applied this test to each of the STMs, with results shown in Fig. S16 (D-statistics and Z-scores are listed in Table S6). We find that each STM individual is significantly closer related to Yoruba than to any non-African individual, consistent with an African origin of the individuals. Within Africa, the ancient individuals are significantly closer related to Yoruba than to individuals from hunter-gatherer populations (San, Mbuti Pygmy). The only non-significant statistics result from tests involving Mandenka and Dinka. This is more likely to be due to a lack of ancient sequence data, as opposed to low population differentiation ( $F_{st}$ ) between these populations.

### 14 Principal component analysis

For each file containing the genotypes of the sample and reference panels, we ran `smartpca` (EIGENSOFT vers. 4.0) (83, 84) to perform principal components analysis (PCA). We also ran `smartpca` on the filtered reference panel (prior to step iii. in section 12) to calculate the reference-only eigenvectors. Eigenvectors were plotted independently for each dataset using RStudio (<http://www.rstudio.org/>). In order to visualize the three samples in a single PCA plot we used the VEGAN package (<http://vegan.r-forge.r-project.org>) to perform Procrustes transformation in R, as done in (77). We transformed the first two principal components calculated for each intersected dataset to match the reference-only PC1 and PC2. When transforming the PCs, the ancient individual was excluded. The configuration of transformed PC1 and PC2 was then applied to the ancient individuals, and transformed coordinates were overlaid on the reference-only PC1 and PC2 plot (Fig. 1C). Individual PCA plots for STM1-3 are shown in Fig. S19.

#### *Assessing the effect of potential contamination*

We used PMDtools (31) to filter bam files and retain only reads carrying the characteristic signatures of aDNA damage. We selected reads with a `pmd` (post-mortem damage) score of  $\geq 3$  (retaining 58,078, 59,994 and 103,464 reads after setting the `pmd` threshold of 3 for STM1, STM2, STM3, respectively) and intersected them with the reference panel to assess if the PCA

using only damaged reads displayed the same clustering of the sample as with the unfiltered set (Fig. S18).

### 15 *TreeMix* analysis

We used the files with the intersected genotypes between our samples and our reference panel (79) to estimate the allele frequencies per population and considering each of the Zoutsteeg individuals as one population, therefore the allele frequency would always be either 0 or 1 (or 0 and 2 in terms of allele counts). We used PLINK (78) to estimate allele frequencies per population and formatted the output with the script `plink2treemix.py` distributed along with the *TreeMix* (85) software. We used these frequencies as input for *TreeMix* (85) in order to infer ancestry graphs. For each dataset we ran 100 bootstraps with random seeds and with the `-noss` and `-global` flags to disable sample size correction, and perform a round of global rearrangements of the graph, respectively. Additionally, the number of SNPs per block was calculated for each dataset to allow approximately 1000 blocks. Finally, the root of the tree was set to Xhosa. The results of the *TreeMix* (85) analysis are shown in Fig. S20.

### 16 Admixture analysis

We used the maximum likelihood-based clustering algorithm ADMIXTURE (86) to estimate the genetic structure in our merged dataset (see section 12). We first estimated the cross-validation error running ADMIXTURE (86) with the `--cv` flag for  $K$  values between 1 and 6. This analysis revealed that the CV error increased with  $K$ , probably reflecting the very low  $F_{st}$  between the populations in such reference panel. For  $K=4$  to  $K=6$  we ran a hundred replicates using a random seed and kept the  $Q$  (ancestral cluster proportions) and  $P$  (inferred ancestral cluster allele frequencies) matrices from the run with the best log likelihood. We used the  $P$  matrix from each  $K$  to estimate the most likely cluster proportions in the ancient samples as was done in (87). Fig. S21 shows the ancestry proportions of STM1, STM2 and STM3 and 11 sub-Saharan populations from our reference panel (79). Plots were generated using a maximum-likelihood approach implemented in ADMIXTURE (86) and show converged runs from  $K=2$  to  $K=6$  in 100 replicates.



## Supplementary Figures

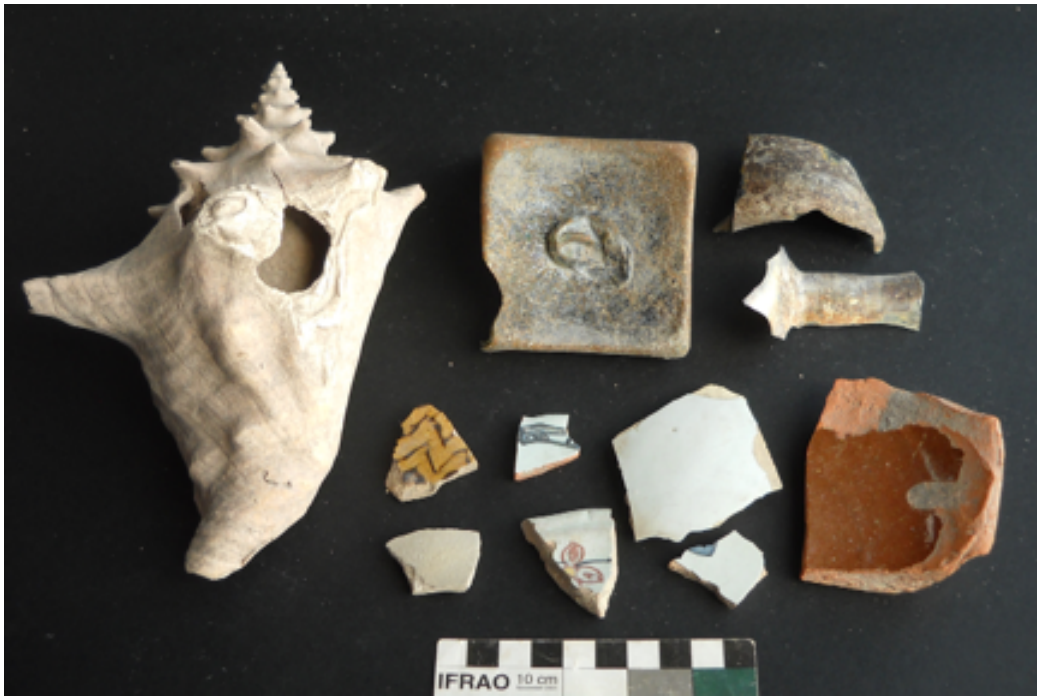

Fig. S1. Late 17th-century artifacts found in the same layer as three Zoutsteeg burials.  
Reproduced with permission from ref. 11.

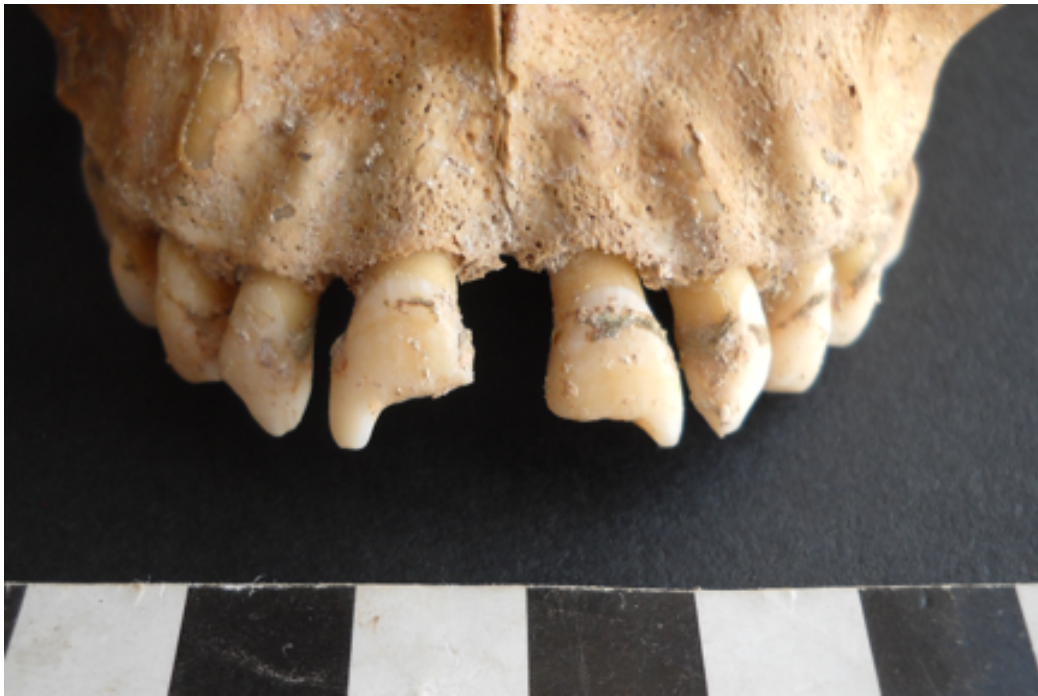

**Fig. S2.** STM1 maxilla showing a type of dental modification common in West-Central Africa.  
Reproduced with permission from ref. 11.

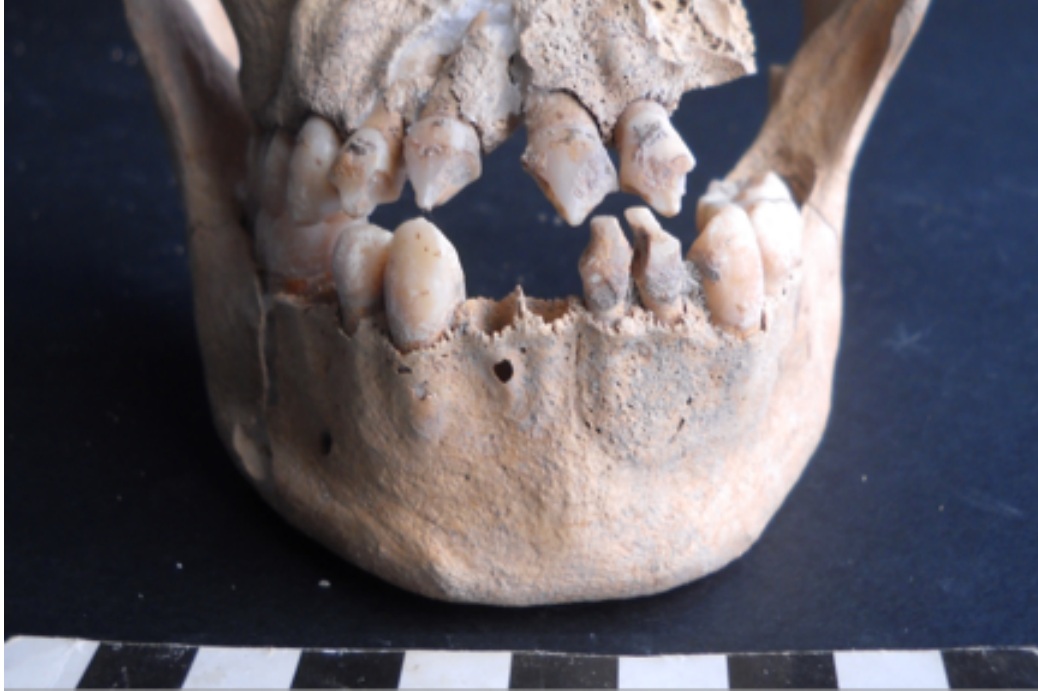

**Fig. S3.** Maxilla and mandible of STM2 showing a common type of African dental modification. Reproduced with permission from ref. 11.

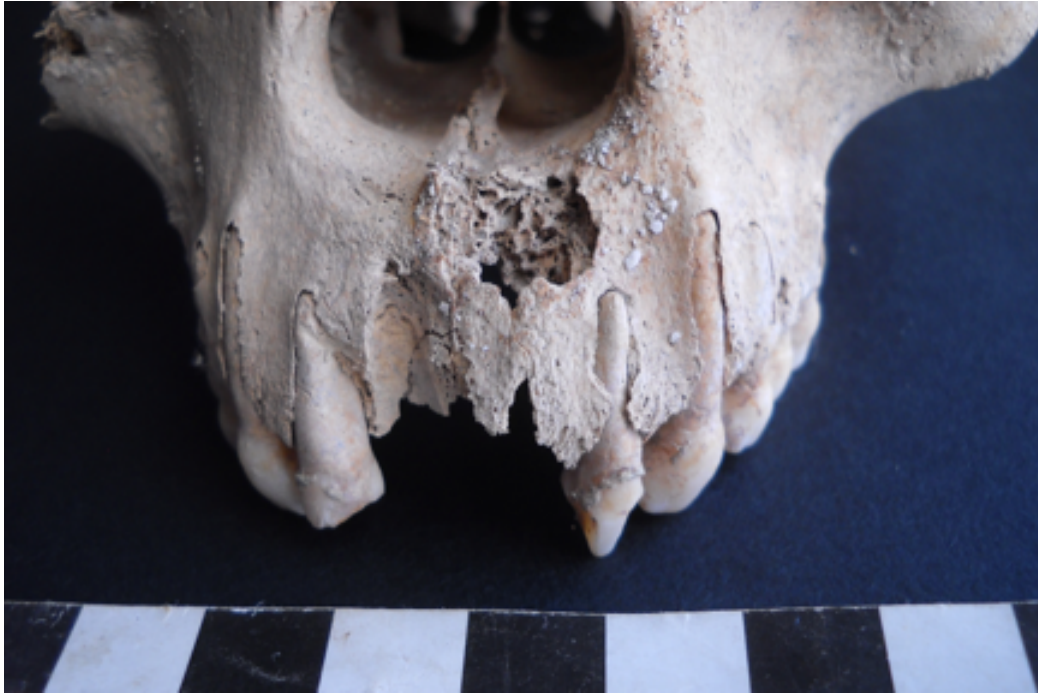

**Fig. S4.** Maxilla of STM3 showing a modified incisor. Reproduced with permission from ref. 11.

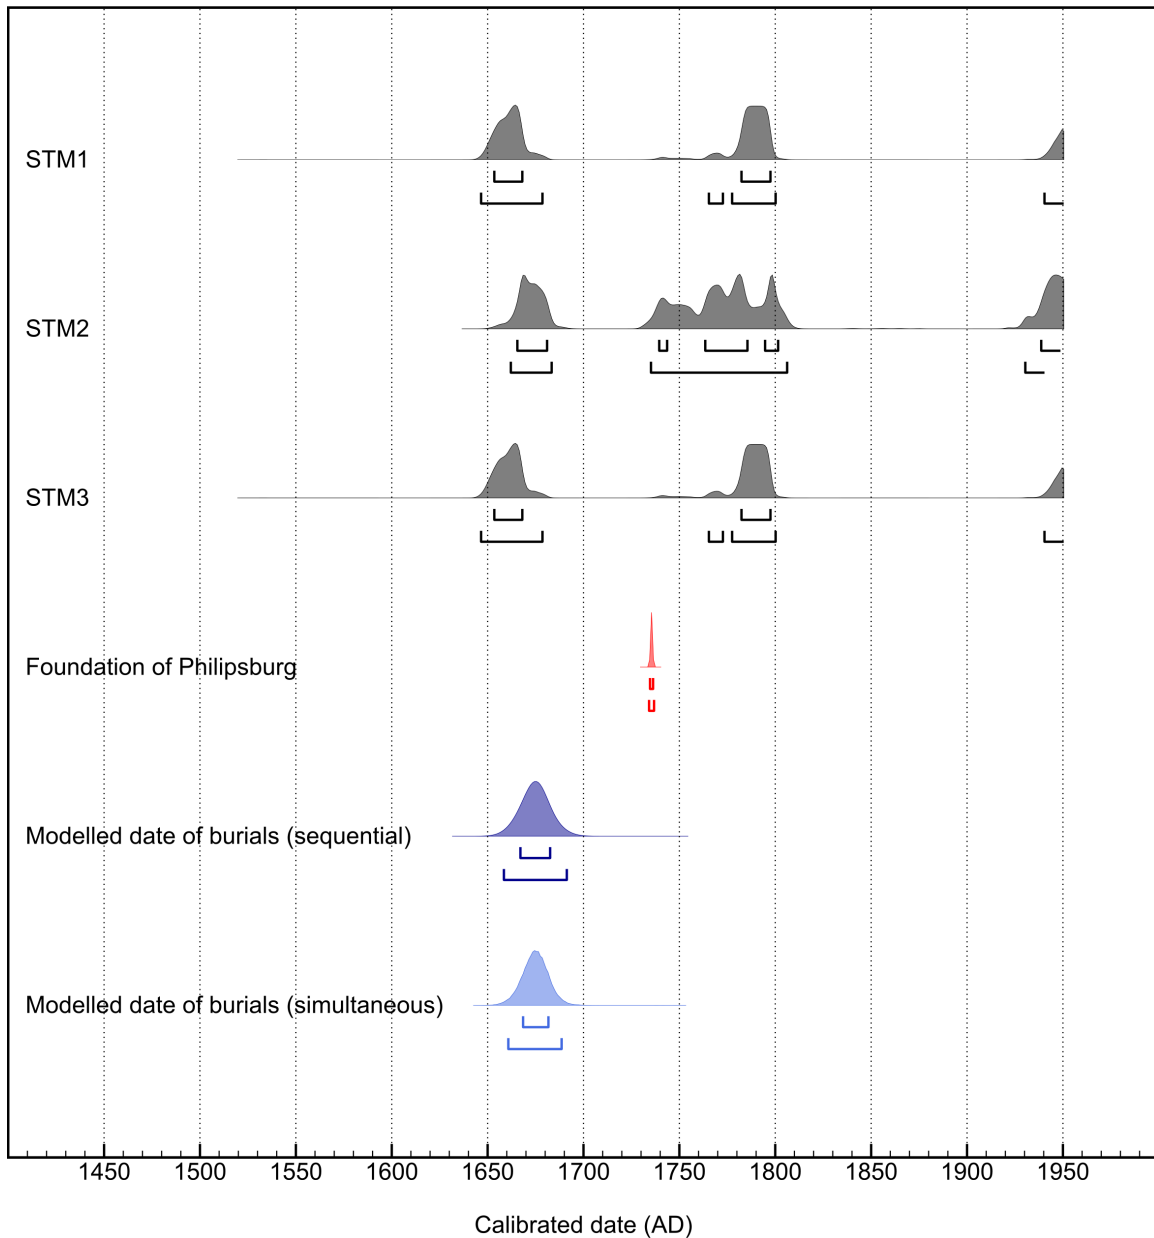

**Fig. S5.** The calibrated radiocarbon dates obtained for the three individuals (STM1-3, 68% and 95% probability ranges given beneath). These results were added to a Bayesian model that also included the foundation date of St Martin (1735 AD), and an approximation for the turnover rate of bone collagen ( $10 \pm 5$  years). The modeled output for the date of the burials is given by the dark blue distribution [1667-1682 AD (68%); 1658-1691 AD (95%)]. The output if the assumption is made that the burials all took place in the same year is also given [light blue distribution, 1668-1681 AD (68%); 1660-1688 AD (95%)].

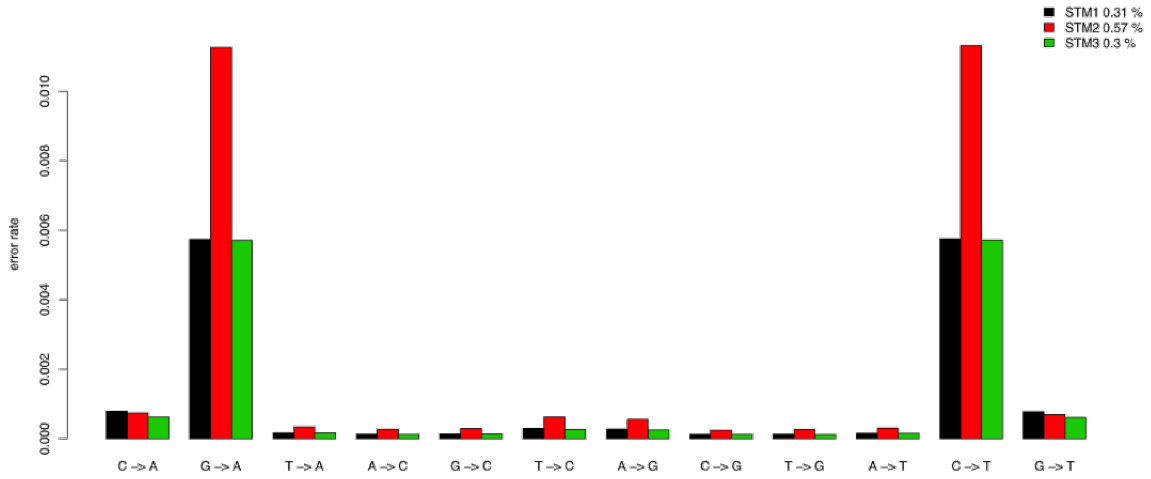

**Fig. S6.** Type specific error rates. Error estimates for STM1, STM2, and STM3 based on an outgroup and a "high quality genome". Each bar represents a type-specific error. The overall error estimates are shown in the legend next to the sample ID.

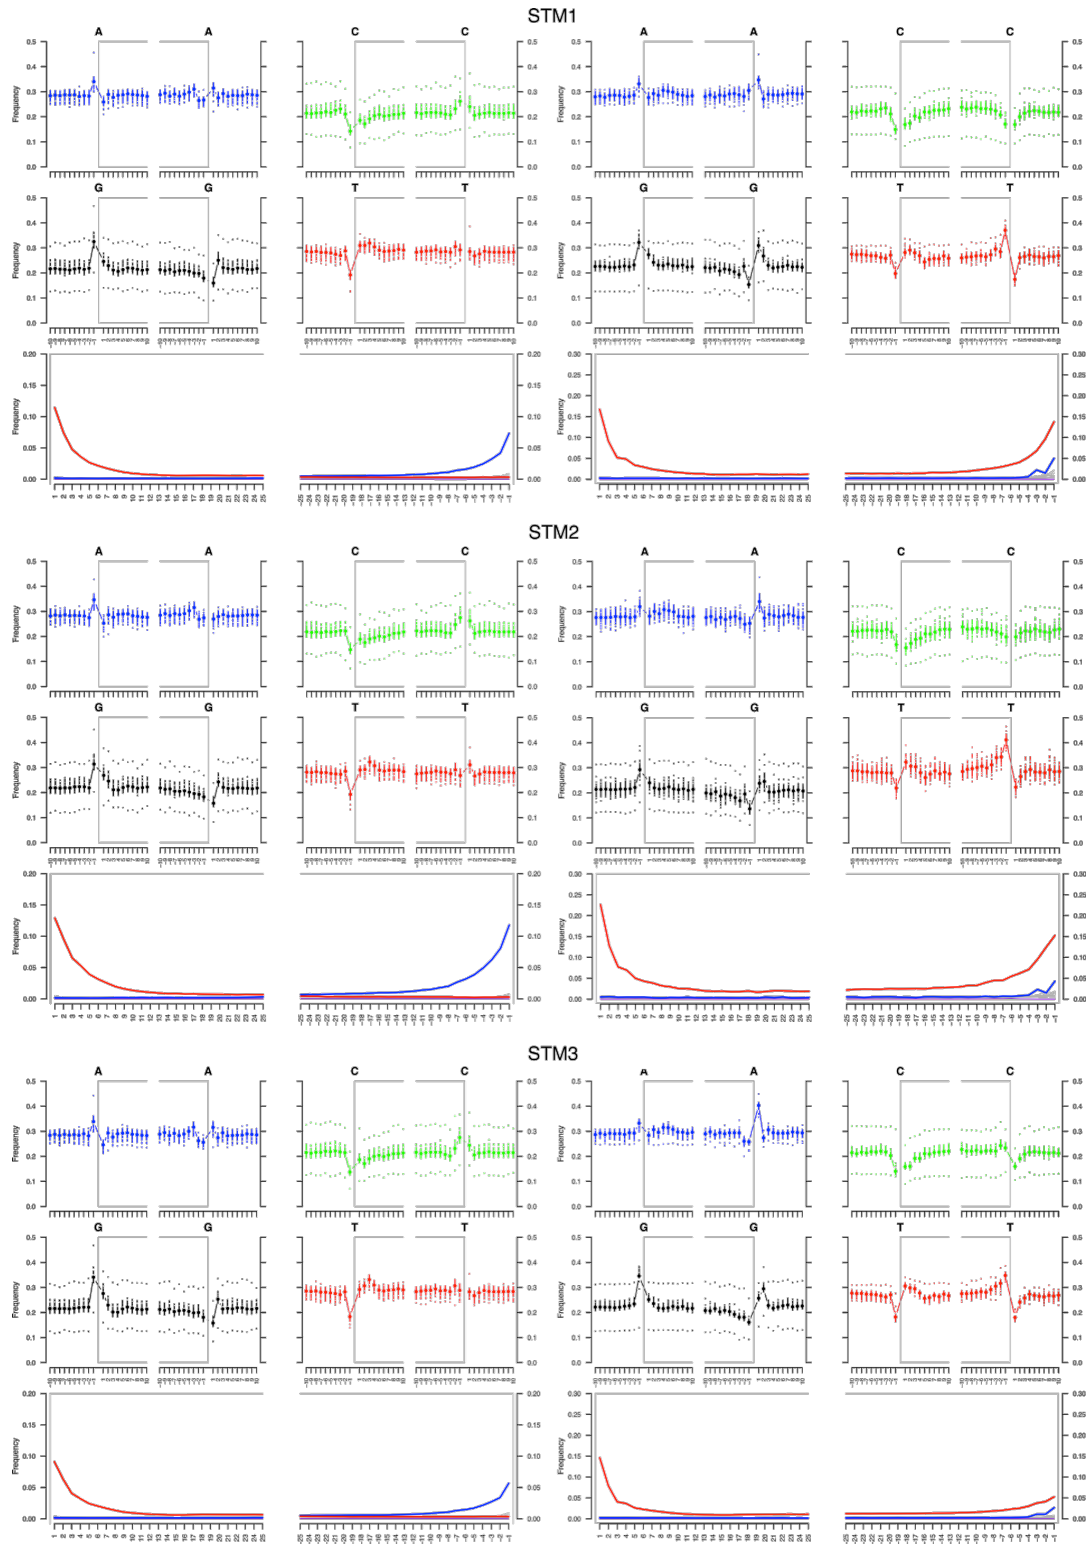

**Fig. S7.** Damage patterns for STM1-3. Plots on the left show damage patterns for libraries built with the double-stranded method. Plots on the right show the patterns for those built with the single-stranded method. Plots were made with mapDamage2.0 (29).

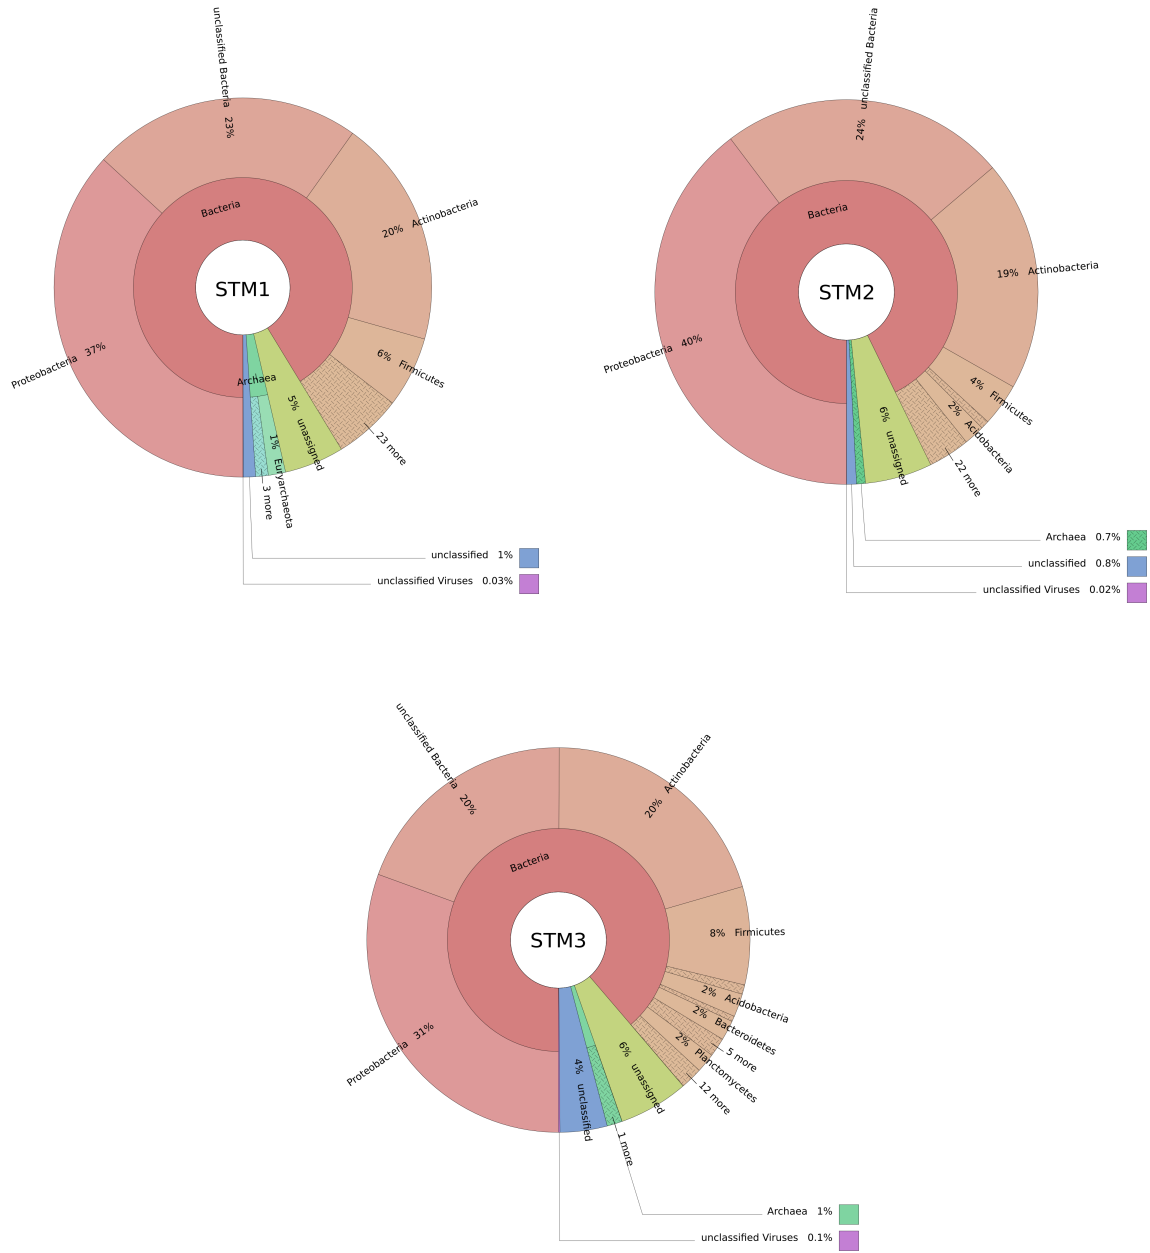

**Fig. S8.** Metagenomic profiles for STM1-3. Distribution of major taxonomic groups based on metagenomic analysis of the non-human fraction of the shotgun reads using on MG-RAST (45). Plots were made with KronaTools-2.4 (46).



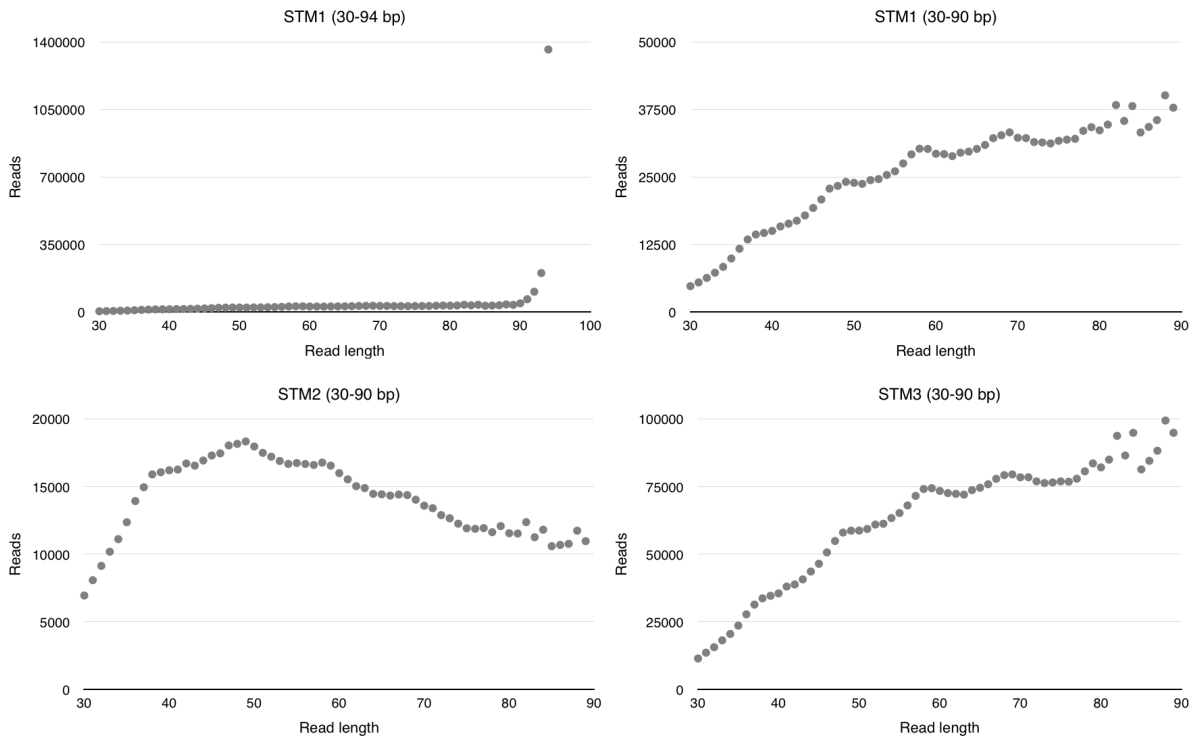

Fig. S9. Read length distributions for samples STM1-3.

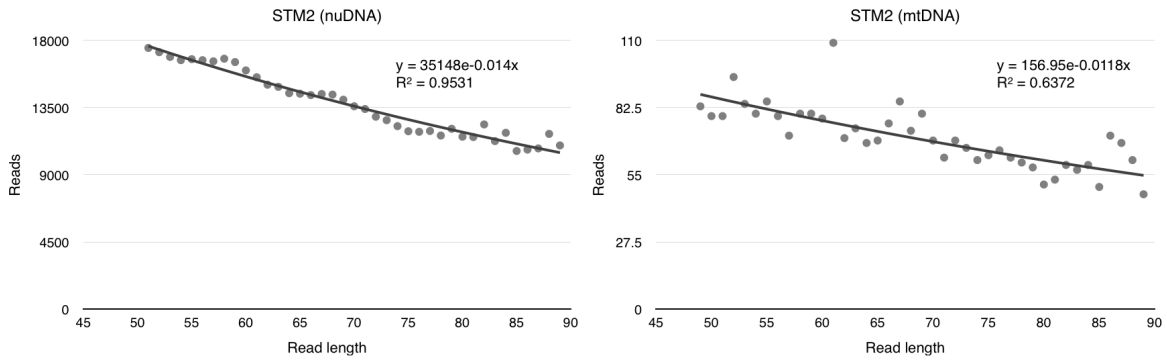

**Fig. S10.** Molecular decay rates for STM2. Nuclear and mitochondrial read length distributions showing only the declining part of the distributions, used to estimate DNA decay rates. Trendline, equation and  $R^2$  value represent best fit for an exponential decline, as expected under a model of random fragmentation. The correlation for mtDNA is weaker due to a smaller dataset and hence more stochasticity.

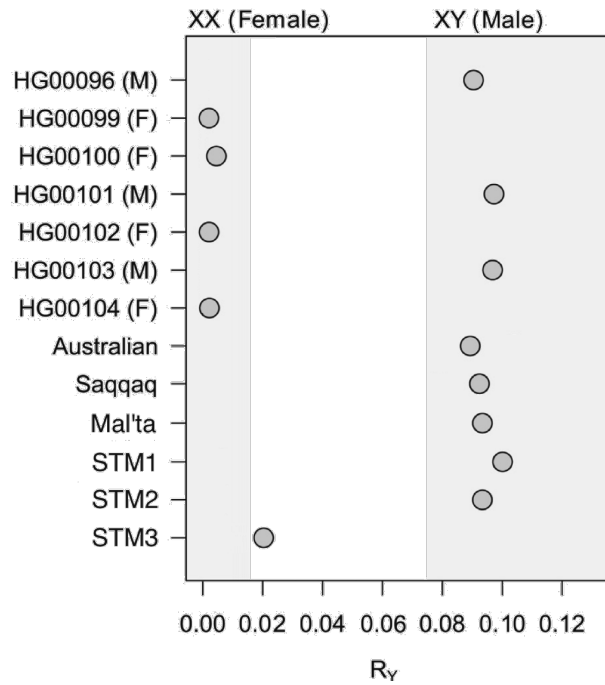

**Fig. S11.** Biological sex of the Zoutsteeg individuals. The ratio  $R_Y$  represents the observed fraction of Y chromosome reads compared to the total number of reads aligned to either sex chromosome (58). The ratio is given for 7 present-day humans of known sex (F: Female; M: Male) and 6 historical/ancient human individuals including the Australian Aborigine (59), the Saqqaq (60), the Mal'ta individual (34) and the Zoutsteeg Three. The mean  $R_Y$  ratio for the females in the reference panel was  $\sim 0.0022$  and  $\sim 0.09$  for the males. Grey shaded areas represent 3 standard errors of the mean (58).

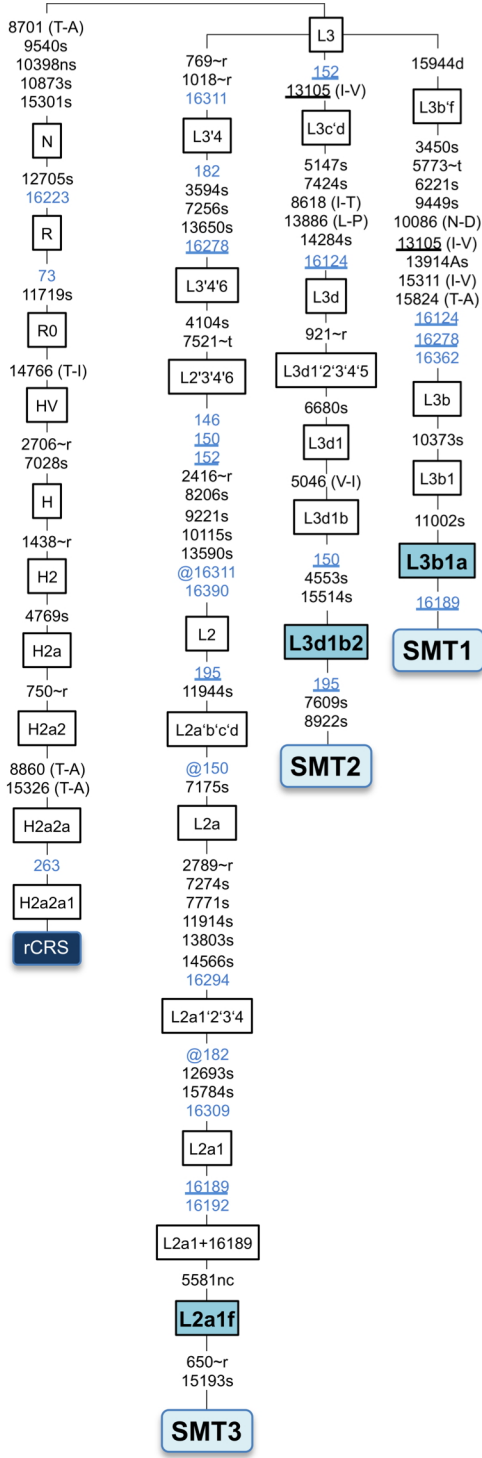

**Fig. S12.** Maximum parsimony tree of the mitogenomes analyzed in the present study. The position of the rCRS (54) is indicated for reading off sequence motifs. Rectangular boxes contain haplogroup labels following Phylotree Build 16 (<http://www.phylotree.org>; and the rCRS orientated version). Mutational changes are shown along branches. In blue are polymorphisms falling in the control region. Mutations are transitions unless a suffix A, C, G, or T indicates a transversion. Other suffixes are: insertions (+), synonymous substitutions (s), mutations occurring at tRNAs (-t), mutational changes occurring at rRNAs (-r), non-coding variants located in the mtDNA coding region (-nc), and amino acid replacements. A back mutation is represented with the prefix "@", whereas an underlined mutation represents a recurrent mutation in the phylogeny represented in the figure. As usual, variants at positions A16182C, A16183C, variation around position 310 and length or point heteroplasmies were not considered for the phylogenetic reconstruction.

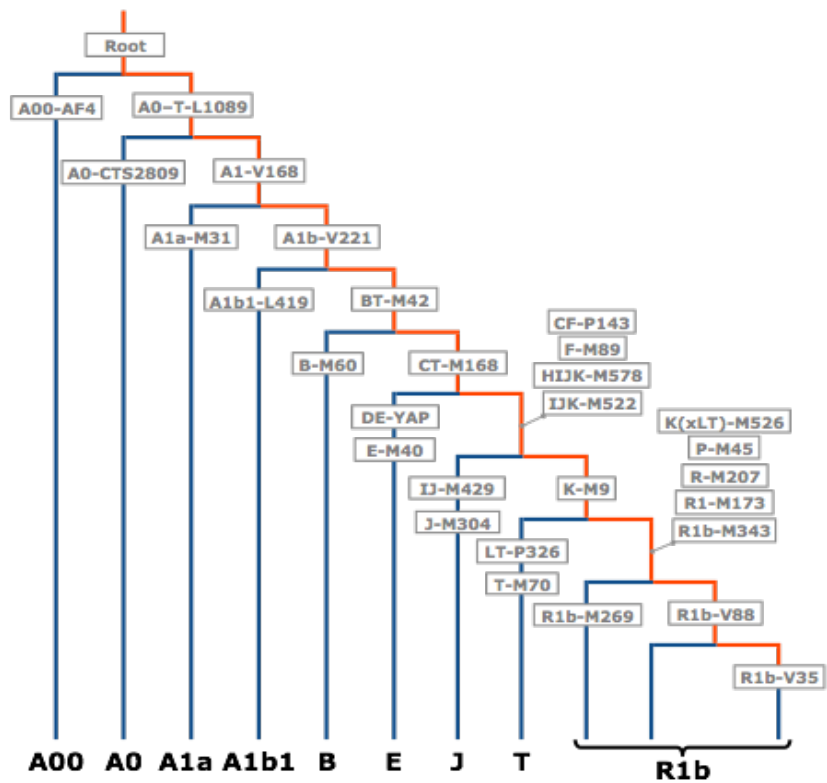

**Fig. S13.** The Y-chromosome phylogeny, restricted to lineages previously reported to occur at appreciable frequency in Africa. We observed derived (ancestral) alleles for the SNPs corresponding to the branches indicated in orange (blue).

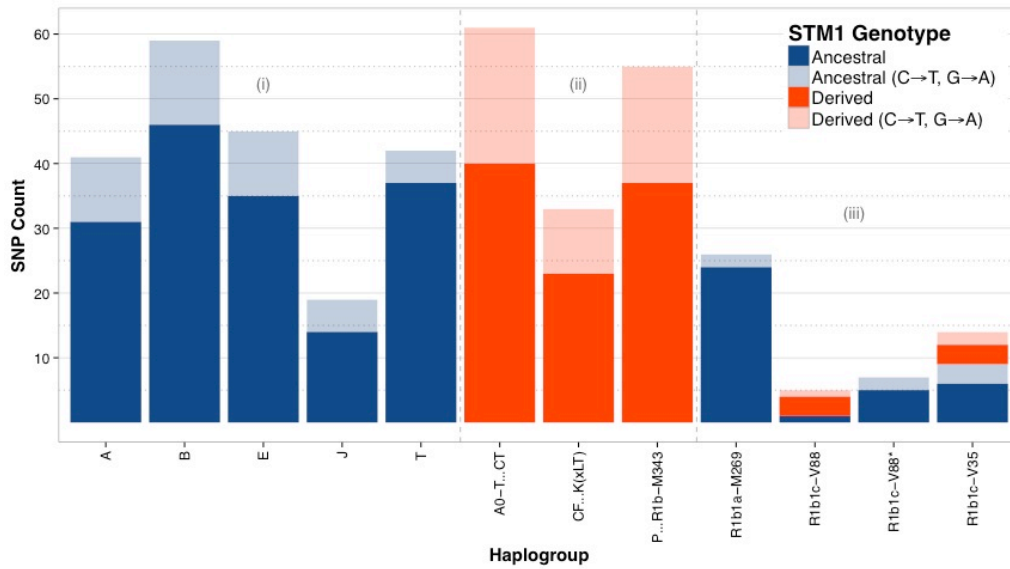

**Fig. S14.** STM1 Y-chromosome haplogroup classification. Counts of phylogenetically informative SNPs, stratified by STM-1 genotype (ancestral in orange, derived in blue) and mutation type (C→T and G→A transitions colored more lightly).

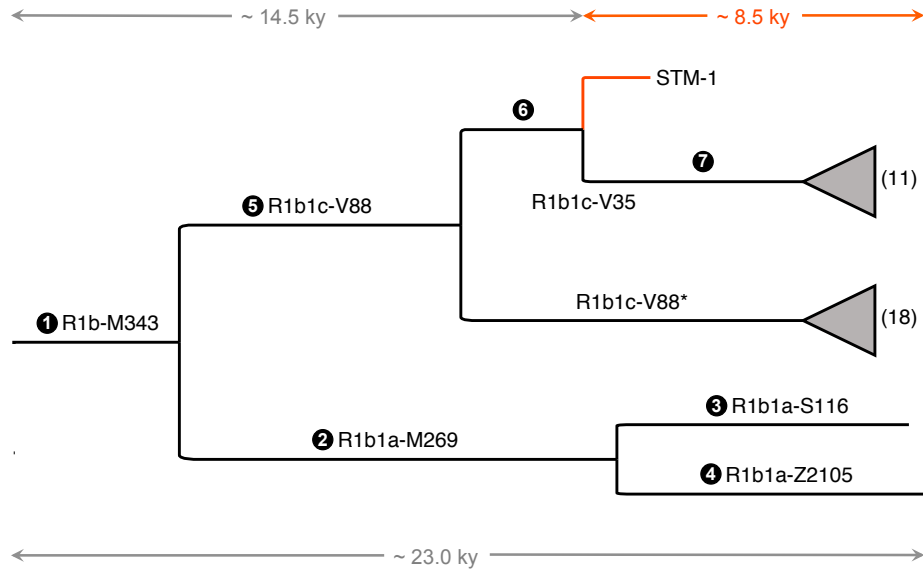

**Fig. S15.** The Y-chromosome lineage of STM1, with respect to 29 low-coverage R1b1c-V88 sequences from (65) and two higher coverage R1b1a-M269 sequences from (36). Divergence times indicated in grey were directly estimated, and their difference was used to infer an 8.5 kya split-time between STM1 and the Sardinian V35 lineages. The shortness of the STM1 branch is due to low coverage.

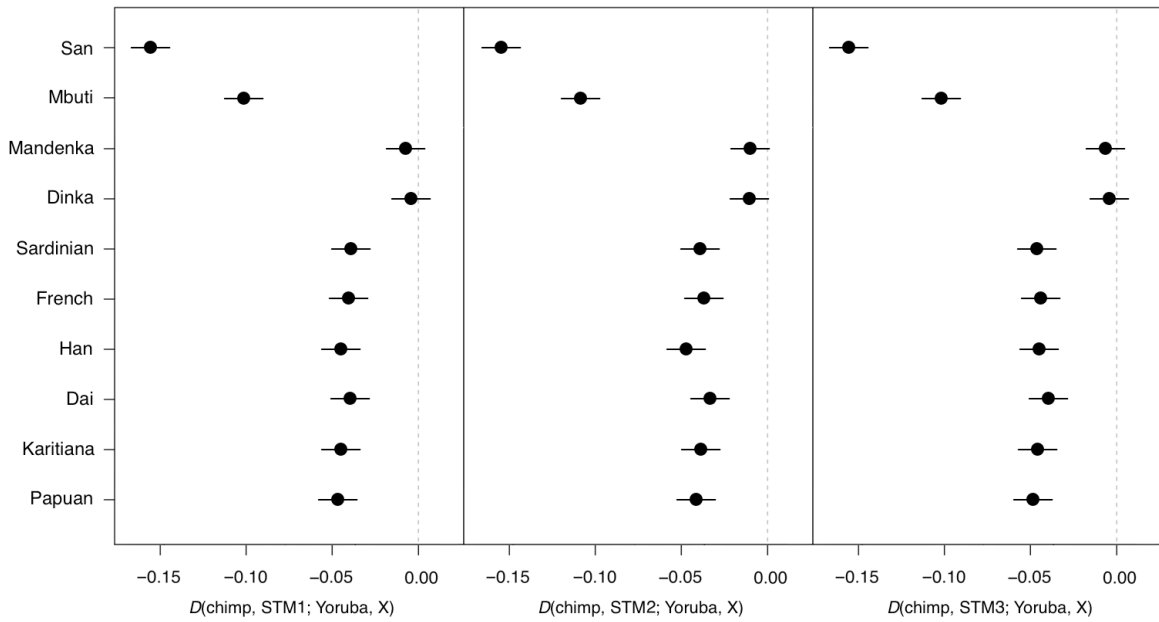

**Fig. S16.** Results for sequence-based D-statistic test. The test takes the form  $D(\text{chimp, STM; Yoruba, X})$  with STM standing for one of the Zoutsteeg Three and X representing one of 11 modern human genomes other than Yoruba (17). We find that each of the Zoutsteeg individuals is significantly closer related to Yoruba than to any non-African individual, consistent with an African origin of the individuals. Within Africa, the ancient individuals are significantly closer related to Yoruba than to individuals from hunter-gatherer populations (San, Mbuti pygmies). The only non-significant statistics result from tests involving Mandenka and Dinka, which are consistent with forming a clade with Yoruba to the exclusion of the ancient individuals. This is likely a consequence of a lack of power to detect more fine scale population relatedness within sub-Saharan African populations that are not of a hunter-gatherer origin. D-statistic values and Z scores are listed in Table S6.



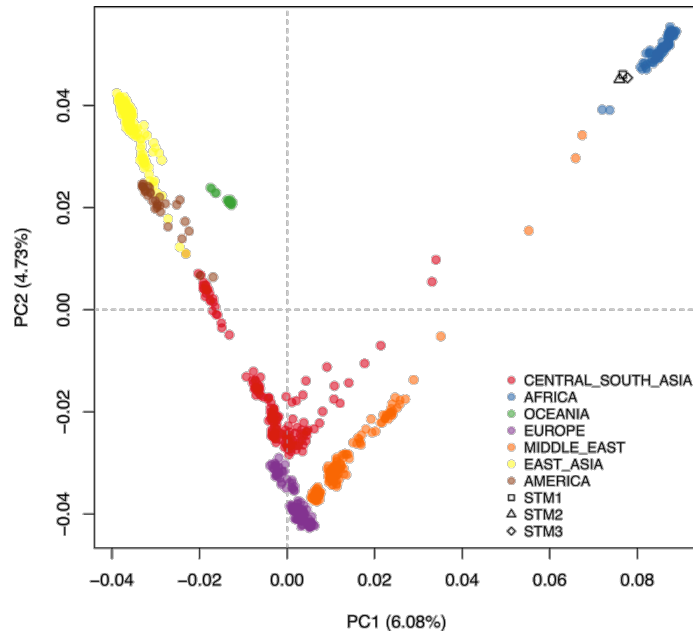

**Fig. S17.** Principal component plot (PC1 versus PC2) the position of STM1, STM2 and STM3 with respect to a panel of 52 global reference populations.

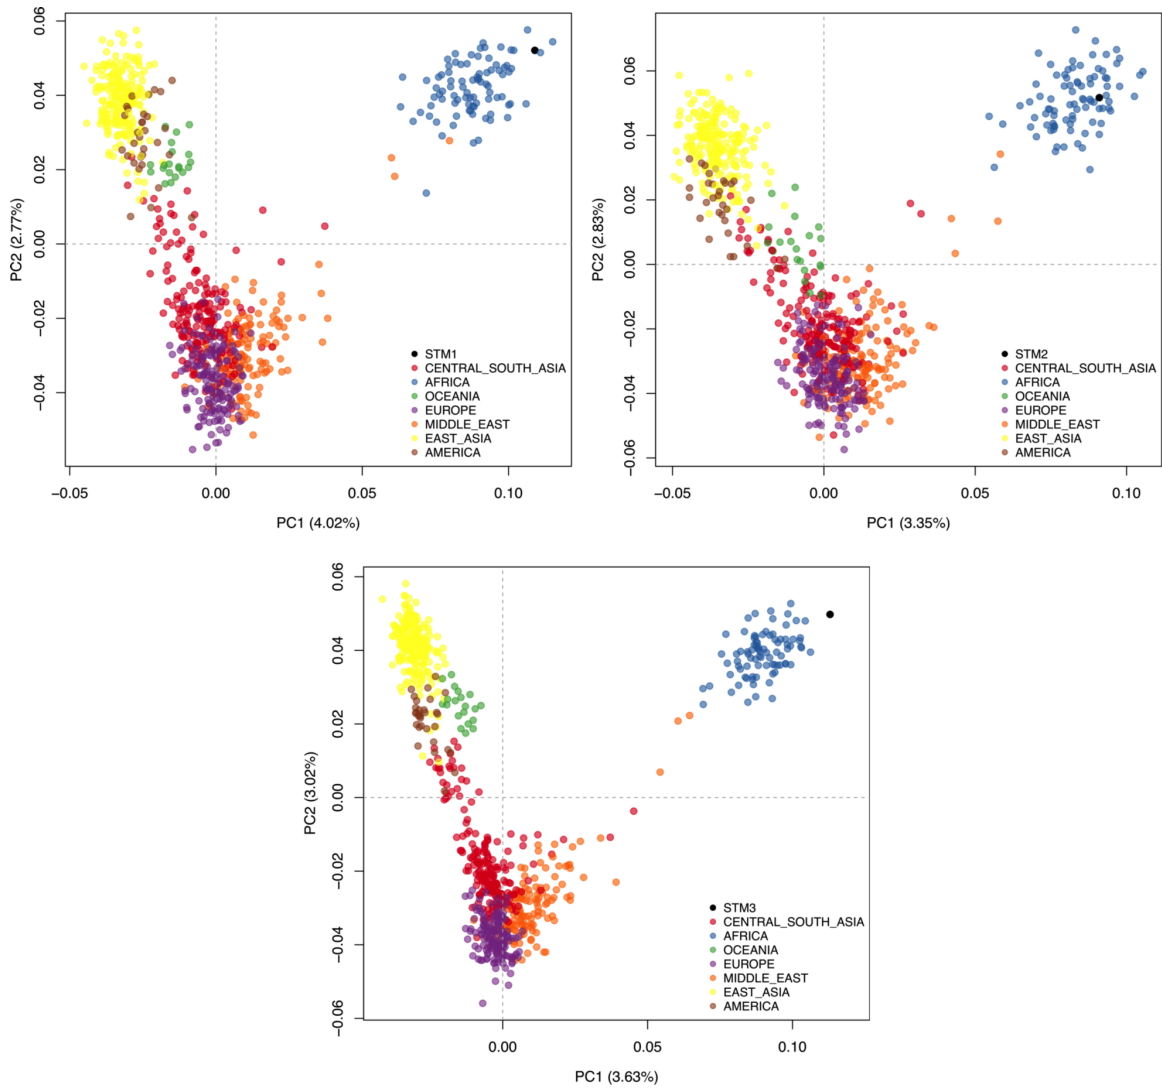

**Fig. S18.** Individual principal component plots (PC1 versus PC2) for STM1, STM2 and STM3 versus a global reference panel using damaged reads only (30).

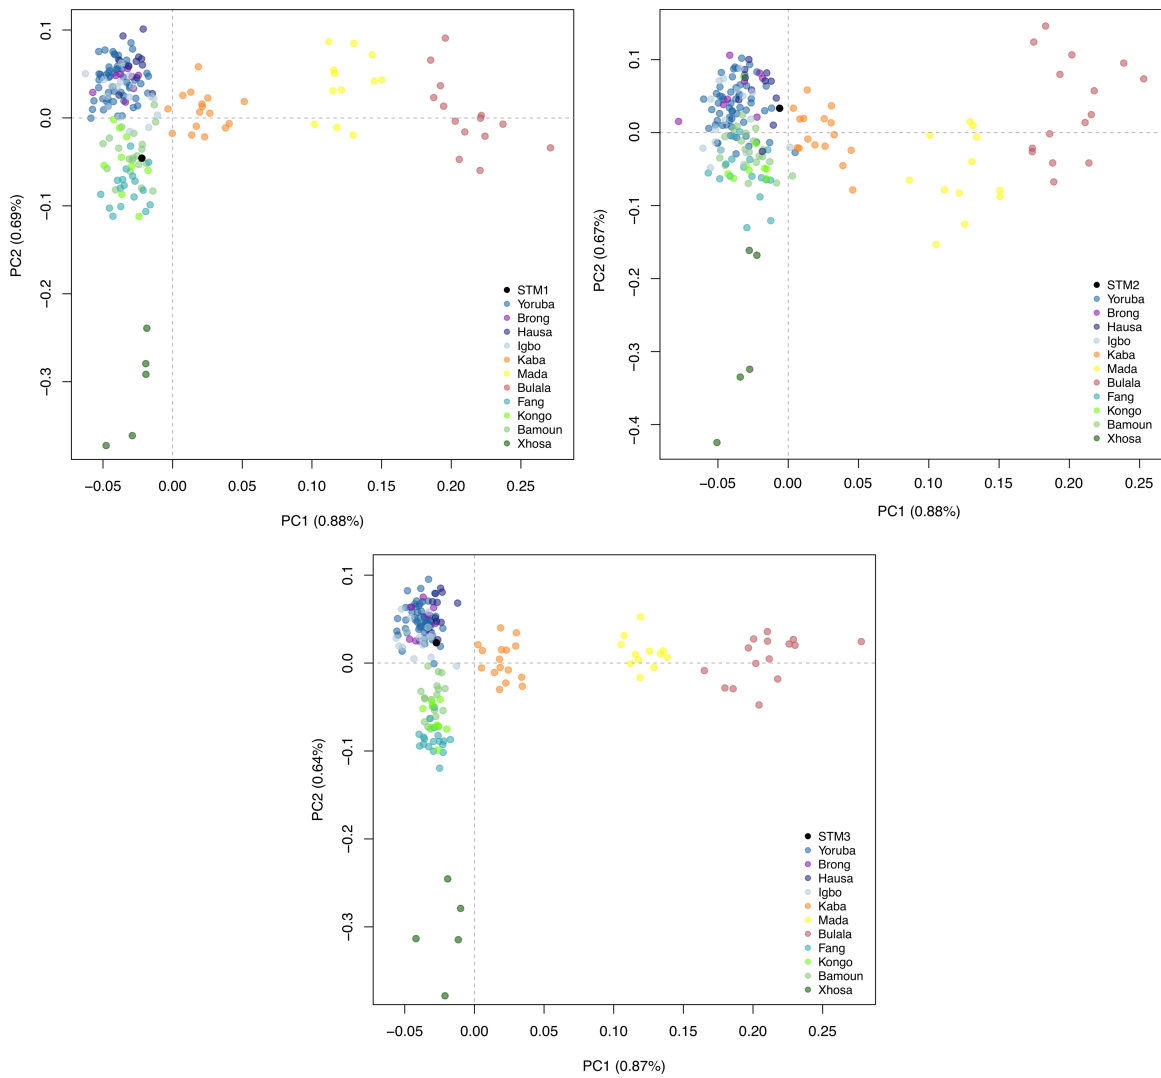

**Fig. S19.** Individual principal component plots (PC1 versus PC2) for STM1, STM2 and STM3 and 11 African populations from our reference panel (78). Plots have been rotated to mirror the geographic distribution of the reference populations.

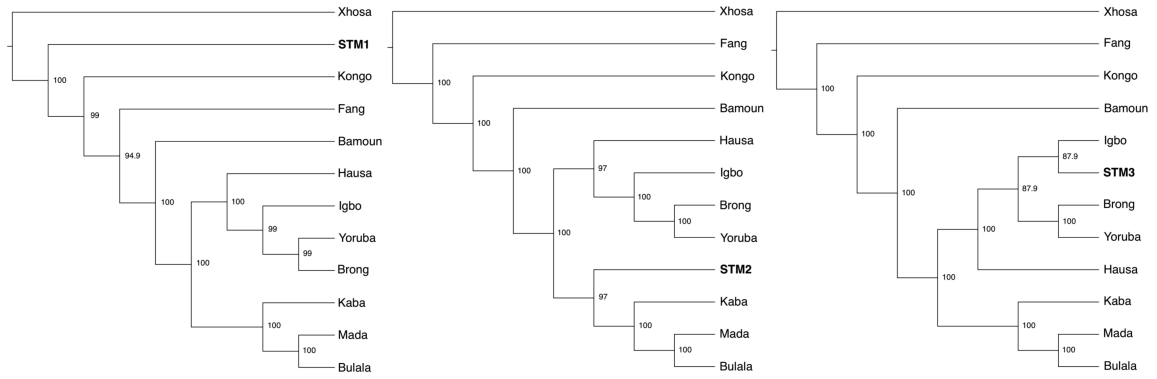

**Fig. S20.** Maximum likelihood phylogenies for STM1-3 and 11 sub-Saharan populations from our reference panel (78). The trees were constructed using TreeMix (84).

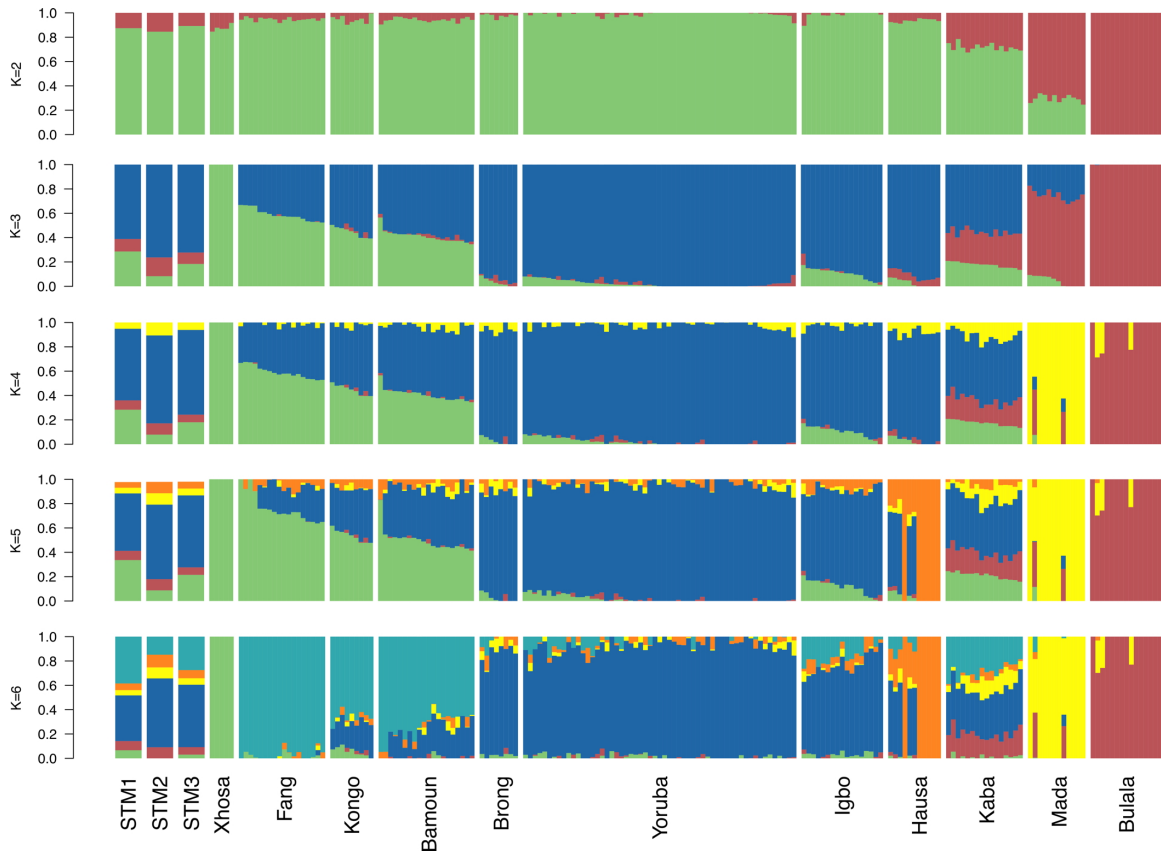

**Fig. S21.** Admixture analysis. Ancestry proportions of STM1, STM2 and STM3 and a panel of 11 sub-Saharan populations from (78). Plots were generated using a maximum-likelihood approach implemented in ADMIXTURE (85) and show converged runs from K=2 to K=6 in 100 replicates.

## Supplementary Tables

Table S1. Summary of radiocarbon dating results.

| Sample ID | UCIAMS # | <sup>14</sup> C Age (yrs BP) | Error | cal AD (2 SD) | δ <sup>13</sup> C (‰) | δ <sup>15</sup> N (‰) | C/N ratio |
|-----------|----------|------------------------------|-------|---------------|-----------------------|-----------------------|-----------|
| STM1      | 142831   | 220                          | 20    | 1646-1950     | -13.6                 | 8.4                   | 3.21      |
| STM2      | 142832   | 190                          | 20    | 1661-1950     | -20.3                 | 9.9                   | 3.22      |
| STM3      | 142834   | 220                          | 20    | 1646-1950     | -18.8                 | 7.3                   | 3.22      |

**Table S2.** Sequencing results for double-stranded libraries before and after whole genome capture.

|                       | Before capture (shotgun) |             |             | After capture (WISC/MYBait) |             |            |
|-----------------------|--------------------------|-------------|-------------|-----------------------------|-------------|------------|
|                       | STM1                     | STM2        | STM3        | STM1                        | STM2        | STM3       |
| <b>Raw reads</b>      | 122,654,644              | 377,671,782 | 111,370,579 | 85,135,530                  | 395,550,610 | 75,195,196 |
| <b>Trimmed reads</b>  | 115,192,135              | 350,113,051 | 99,196,939  | 83,337,755                  | 383,644,976 | 72,023,222 |
| <b>Mapped reads</b>   | 3,369,606                | 1,264,824   | 8,685,823   | 20,941,366                  | 36,236,367  | 24,640,959 |
| <b>Unique reads</b>   | 3,323,371                | 1,253,484   | 8,518,830   | 12,447,508                  | 2,128,028   | 16,455,675 |
| <b>Endogenous (%)</b> | 2.7                      | 0.3         | 7.6         | 14.6                        | 0.5         | 21.9       |
| <b>Clonality (%)</b>  | 1.4                      | 0.9         | 1.9         | 40.6                        | 94.1        | 33.2       |
| <b>Read length</b>    | 80.5                     | 69.9        | 81.1        | 88.3                        | 86.1        | 87.6       |

**Table S3.** Sequencing results for single-stranded libraries before and after whole genome capture.

|                       | Before capture (shotgun) |         |           | After capture (WISC/MYBait) |             |            |
|-----------------------|--------------------------|---------|-----------|-----------------------------|-------------|------------|
|                       | STM1                     | STM2    | STM3      | STM1                        | STM2        | STM3       |
| <b>Raw reads</b>      | 1,157,288                | 871,151 | 1,203,557 | 34,742,844                  | 121,722,782 | 31,466,527 |
| <b>Trimmed reads</b>  | 1,035,524                | 779,225 | 1,082,887 | 30,278,361                  | 103,569,318 | 28,039,274 |
| <b>Mapped reads</b>   | 55,371                   | 13,618  | 175,600   | 6,059,526                   | 12,006,896  | 10,157,948 |
| <b>Unique reads</b>   | 55,290                   | 13,595  | 175,302   | 2,331,771                   | 1,484,184   | 7,219,555  |
| <b>Endogenous (%)</b> | 5.3                      | 1.7     | 16.2      | 6.7                         | 1.2         | 22.9       |
| <b>Clonality (%)</b>  | 1.4                      | 0.9     | 1.9       | 61.5                        | 87.6        | 28.9       |
| <b>Read length</b>    | 55.1                     | 49.2    | 62.6      | 64.9                        | 64.4        | 70.7       |



**Table S4.** Comparison of DNA decay in genomic data from bones of different preservation environments. Approximate ages and estimated burial temperatures are listed. Lambda ( $\lambda$ ) is the DNA damage fraction (per site) estimated directly from the fragment length distributions and  $1/\lambda$  is the estimate true average DNA fragment length in the bone. Lambda is converted to decay rate ( $k$ , per site per year) by dividing with sample age. Molecular half-lives for 100 bp fragments are calculated as in (47). La Braña results are based on data from (50) and Clovis results are based on data from (35).

|                        | Age           | Temp. | $\lambda$ | $k$      | Fragment length | Half-life |
|------------------------|---------------|-------|-----------|----------|-----------------|-----------|
| STM2, Caribbean, nuDNA | 340 yrs BP    | 25°C  | 0.014     | 4.12E-05 | 71 bp           | 169 yrs   |
| STM2, Caribbean, mtDNA | 340 yrs BP    | 25°C  | 0.012     | 3.53E-05 | 83 bp           | 197 yrs   |
| La Braña, Spain, nuDNA | 7,500 yrs BP  | 8°C   | 0.033     | 4.40E-06 | 30 bp           | 1,576 yrs |
| Anzick, Montana, nuDNA | 12,800 yrs BP | 5°C   | 0.018     | 1.41E-06 | 56 bp           | 4,916 yrs |

**Table S5.** Contamination rate estimates for each sample. The second column represents the number of reads for each sample mapping to the consensus mtDNA sequence. The point estimate error rate is shown on the third column. The maximum a posteriori probability and 95% credible interval for the contamination rate are on column four and five, respectively.

|      | <b>Mt reads</b> | <b>Error rate</b> | <b>MAP contamination (%)</b> | <b>95% CI</b> |
|------|-----------------|-------------------|------------------------------|---------------|
| STM1 | 50,868          | 0.011             | 0.63                         | 0.32-1.07     |
| STM2 | 49,784          | 0.012             | 0.22                         | 0.02-0.63     |
| STM3 | 51,441          | 0.008             | 0.15                         | 0.03-0.38     |

**Table S6.** Summary results for sequence data-based D-statistic tests. H1 stands for Yoruba, H2 for one of 10 other global populations (one genome per population) and H3 one of the STMs. The 'Difference' column shows the number of ABBA minus the number of BABA sites (nABBA-nBABA); the 'Total' column shows the total number of ABBA and BABA sites (nABBA+nBABA); the 'Dstat' column lists the test statistic (nABBA-nBABA)/(nABBA+nBABA); the 'Jackknife' column shows the bias corrected Dstat; the 'SE' column shows the estimated standard error of the estimate used to obtain the Z value; and, the 'Z' column shows the significance value of the test. Negative D-statistics correspond to H3 sharing more alleles with Yoruba than with H2.

| H1     | H2        | H3   | Difference | Total   | Dstat     | Jackknife | SE       | Z         |
|--------|-----------|------|------------|---------|-----------|-----------|----------|-----------|
| Yoruba | San       | STM1 | -52,331    | 350,007 | -0.149514 | -0.149514 | 0.004348 | -34.38317 |
| Yoruba | Mbuti     | STM1 | 32,882     | 342,222 | -0.096084 | 0.096084  | 0.004449 | -21.59600 |
| Yoruba | Mandenka  | STM1 | -3,374     | 330,114 | -0.010221 | -0.010221 | 0.004460 | -2.29165  |
| Yoruba | Dinka     | STM1 | 1,629      | 329,483 | -0.004944 | 0.004944  | 0.004136 | -1.19550  |
| Yoruba | Sardinian | STM1 | 9,442      | 331,046 | -0.028522 | 0.028522  | 0.004437 | -6.42871  |
| Yoruba | French    | STM1 | 10,030     | 332,086 | -0.030203 | 0.030203  | 0.004328 | -6.97929  |
| Yoruba | Han       | STM1 | 11,093     | 332,789 | -0.033333 | 0.033333  | 0.004225 | -7.88885  |
| Yoruba | Dai       | STM1 | -10,330    | 331,586 | -0.031153 | -0.031153 | 0.004269 | -7.29738  |
| Yoruba | Karitiana | STM1 | -10,762    | 331,772 | -0.032438 | -0.032438 | 0.004602 | -7.04889  |
| Yoruba | Papuan    | STM1 | 14,422     | 335,270 | -0.043016 | 0.043016  | 0.004468 | -9.62833  |
| Yoruba | San       | STM2 | -18,983    | 122,475 | -0.154995 | -0.154995 | 0.004924 | -31.47631 |
| Yoruba | Mbuti     | STM2 | 12,860     | 119,446 | -0.107664 | 0.107664  | 0.004728 | -22.77179 |
| Yoruba | Mandenka  | STM2 | -1,413     | 115,559 | -0.012228 | -0.012228 | 0.004939 | -2.47575  |
| Yoruba | Dinka     | STM2 | 1,393      | 115,375 | -0.012074 | 0.012074  | 0.004835 | -2.49731  |
| Yoruba | Sardinian | STM2 | 3,165      | 116,101 | -0.027261 | 0.027261  | 0.004865 | -5.60317  |
| Yoruba | French    | STM2 | 3,034      | 116,092 | -0.026134 | 0.026134  | 0.004721 | -5.53532  |
| Yoruba | Han       | STM2 | 4,367      | 117,063 | -0.037305 | 0.037305  | 0.004854 | -7.68580  |
| Yoruba | Dai       | STM2 | -3,000     | 116,536 | -0.025743 | -0.025743 | 0.004706 | -5.47008  |
| Yoruba | Karitiana | STM2 | -4,206     | 116,780 | -0.036016 | -0.036016 | 0.005054 | -7.12577  |
| Yoruba | Papuan    | STM2 | 4,839      | 117,977 | -0.041016 | 0.041016  | 0.004987 | -8.22500  |
| Yoruba | San       | STM3 | -83,211    | 537,697 | -0.154754 | -0.154754 | 0.003817 | -40.54369 |
| Yoruba | Mbuti     | STM3 | 53,652     | 526,988 | -0.101809 | 0.101809  | 0.004104 | -24.81020 |
| Yoruba | Mandenka  | STM3 | -3,409     | 509,017 | -0.006697 | -0.006697 | 0.004099 | -1.63399  |
| Yoruba | Dinka     | STM3 | 2,476      | 507,590 | -0.004878 | 0.004878  | 0.004095 | -1.19114  |
| Yoruba | French    | STM3 | 17,724     | 509,850 | -0.034763 | 0.034763  | 0.004252 | -8.17586  |
| Yoruba | Sardinian | STM3 | 17,981     | 509,315 | -0.035304 | 0.035304  | 0.004315 | -8.18268  |
| Yoruba | Han       | STM3 | 19,042     | 513,304 | -0.037097 | 0.037097  | 0.004303 | -8.62139  |
| Yoruba | Dai       | STM3 | -17,945    | 510,107 | -0.035179 | -0.035179 | 0.004187 | -8.40273  |
| Yoruba | Karitiana | STM3 | -22,270    | 511,022 | -0.043579 | -0.043579 | 0.004165 | -10.46407 |
| Yoruba | Papuan    | STM3 | 25,217     | 516,839 | -0.048791 | 0.048791  | 0.004662 | -10.46557 |

## References

1. Nichols E (1989) *The Last Miles of the Way: African-American Homegoing Traditions 1890-Present*. South Carolina State Museum, Columbia, SC.
2. Jamieson RW (1995) Material Culture and Social Death: African-American Burial Practices. *Hist Arch* 29:39-58.
3. Bass WM (1987) *Human osteology: a laboratory and field manual*. Missouri Archaeological Society Inc., Columbia, MO.
4. Buikstra JE, Ubelaker DH (1994) *Standards for Data Collection from Human Skeletal Remains*. Arkansas Archaeological Survey, Fayetteville, AR.
5. von Jehring H (1882) Die künstliche Deformierung der Zähne. *Zeitschrift für Ethnologie* 14:213-62.
6. Lignitz H (1919-1922) Die künstlichen Zahnverstümmelungen in Afrika im Lichte der Kulturkreisforschung. *Anthropos* 14-15:891-943.
7. Goose DH (1963) Tooth-mutilation in West Africans. *Man* 63:91-3.
8. Gould AR et al. (1984) Mutilations of the Dentition in Africa: A Review with Personal Observations. *Quintessence International* 15:89-94.
9. Reichart PA et al. (2007) Dental mutilations and associated alveolar bone pathology in African skulls of the anthropological skull collection, Charité, Berlin. *J Oral Path Med* 37:50-5.
10. Witkin A (2011) The human skeletal remains. In: A. Pearson et al. (eds.), *Infernal Traffic: Excavation of a Liberated African Graveyard in Rupert's Valley, St Helena*. CBA Research Report 169. Council for British Archeology, York, UK.
11. Schroeder H et al. (2014) The Zoutsteeg Three: Three New Cases of African Types of Dental Modification from Saint Martin, Dutch Caribbean. *Int J Osteoarch* 24:688-96.
12. Schroeder H et al. (2009) Trans-atlantic slavery: Isotopic evidence for forced migration to Barbados. *Am J Phys Anth* 139:547-57.
13. Price TD et al. (2006) Early African diaspora in colonial Campeche, Mexico: Strontium isotopic evidence. *Am J Phys Anth* 130:485-90.
14. Reimer PJ et al. (2013) IntCal13 and Marine13 Radiocarbon Age Calibration Curves 0–50,000 Years cal BP. *Radiocarbon* 55:1869-87.
15. *The Transatlantic Slave Trade Database* (available at <http://slavevoyages.org>).
16. Brown TA et al. (1988) Improved collagen extraction by modified Longin method. *Radiocarbon* 30:171-7.
17. Bronk Ramsey C (1995) Radiocarbon calibration and analysis of stratigraphy: the OxCal program. *Radiocarbon* 37:425-30.
18. Bronk Ramsey C (2009), Bayesian analysis of radiocarbon dates. *Radiocarbon* 51:337-60.
19. Hedges REM et al. (2007) Collagen turnover in the adult femoral mid-shaft: modeled from anthropogenic radiocarbon tracer measurements. *Am J Phys Anth* 133:808-16.
20. Wild EM et al. (2000) 14C dating with the bomb peak: an application to forensic medicine. *Nucl Instr Meth Phys Res B* 172:944-50.
21. Rohland N, Hofreiter M (2007) Ancient DNA extraction from bones and teeth. *Nature Protocols* 2:1756-62.
22. Meyer M, Kircher M (2010) Illumina Sequencing Library Preparation for Highly Multiplexed Target Capture and Sequencing. *Cold Spring Harb Protoc* 2010 (6), pdb.prot5448.
23. Gansauge MT, Meyer M (2013) Single-stranded DNA library preparation for the sequencing of ancient or damaged DNA. *Nature Protocols* 8:737-48.

24. Carpenter ML et al. (2013) Pulling out the 1%: Whole-Genome Capture for the Targeted Enrichment of Ancient DNA Sequencing Libraries. *Am J Hum Genet* 93:852-64.
25. MYbaits manual (available at <http://www.mycroarray.com/pdf/MYbaits-manual.pdf>).
26. Ávila-Arcos MC et al. (in press) Comparative Performance of Two Whole Genome Capture Methodologies on Ancient DNA Illumina Libraries. *Methods Ecol Evol*. DOI: 10.1111/2041-210X.12353
27. Lindgreen S (2012) AdapterRemoval: Easy Cleaning of Next Generation Sequencing Reads. *BMC Res Notes* 5:337.
28. Li H, Durbin R (2009) Fast and accurate short read alignment with Burrows-Wheeler transform. *Bioinform* 25:1754-60.
29. Li H et al. (2009) The Sequence Alignment/Map format and SAMtools. *Bioinform* 25:2078-9.
30. Jónsson H et al. (2013) mapDamage2.0: fast approximate Bayesian estimates of ancient DNA damage parameters. *Bioinform* 29:1682-4.
31. Skoglund P et al. (2014) Separating endogenous ancient DNA from modern day contamination in a Siberian Neandertal. *Proc Natl Acad Sci USA* 111:2229-34.
32. Reich D. et al. (2011) Genetic history of an archaic hominin group from Denisova Cave in Siberia. *Nature* 468:1053-60.
33. Orlando L et al. (2013) Recalibrating Equus evolution using the genome sequence of an early Middle Pleistocene horse. *Nature* 499:74-78.
34. The 1000 Genomes Project Consortium (2012) An integrated map of genetic variation from 1,092 human genomes. *Nature* 491:56-65.
35. Raghavan M et al. (2014) Upper Palaeolithic Siberian genome reveals dual ancestry of Native Americans. *Nature* 505:87-91.
36. Rasmussen M et al. (2014) The genome of a Late Pleistocene human from a Clovis burial site in western Montana. *Nature* 506:225-9.
37. Underhill PA et al. (2014) The phylogenetic and geographic structure of Y-chromosome haplogroup R1a. *Eur J Hum Genet* 1-8.
38. Poznik GD et al. (2013) Sequencing Y chromosomes resolves discrepancy in time to common ancestor of males versus females. *Science* 341:562-5.
39. Karolchik D et al. (2004) The UCSC Table Browser data retrieval tool. *Nucleic Acids Res* 32, D493-6.
40. NCBI: National Center for Biotechnology Information (available at <http://www.ncbi.nlm.nih.gov>)
41. Quinlan AR, Hall IM (2010) BEDTools: a flexible suite of utilities for comparing genomic features. *Bioinform* 26:841-2.
42. Francalacci P et al. (2013) Low-pass DNA sequencing of 1200 Sardinians reconstructs European Y-chromosome phylogeny. *Science* 341:P565-9.
43. Briggs AW et al. (2007) Patterns of damage in genomic DNA sequences from a Neandertal. *Proc Natl Acad Sci USA* 104:14616-21.
44. Meyer M et al. (2012) A high-coverage genome sequence from an archaic Denisovan individual. *Science* 338:222-6.
45. Campos PF et al. (2012) DNA in ancient bone – Where is it located and how should we extract it? *Ann Anat* 194:7-16.
46. Meyer F et al. (2008) The Metagenomics RAST server – A public resource for the automatic phylogenetic and functional analysis of metagenomes. *BMC Bioinform* 9:386.
47. Ondov BD et al., Interactive metagenomic visualization in a Web browser. *BMC Bioinformatics* 12, 385 (2011).
48. Allentoft ME et al. (2012) The half-life of DNA in bone: measuring decay kinetics in 158 dated

- fossils. *Proc R Soc B* 279:4724-33.
49. Dabney J et al. (2013) Complete mitochondrial genome sequence of a Middle Pleistocene cave bear reconstructed from ultrashort DNA fragments. *Proc Natl Acad Sci USA* 110:15758-63.
  50. Deagle BE et al. (2006) Quantification of damage in DNA recovered from highly degraded samples—a case study on DNA in faeces. *Front Zool* 3:11.
  51. Olalde I et al. (2014) Derived immune and ancestral pigmentation alleles in a 7,000-year-old Mesolithic European. *Nature* 507:225-8.
  52. Lindahl T (1993) Instability and decay of the primary structure of DNA. *Nature* 362:709-15.
  53. Smith CI et al. (2003) The thermal history of human fossils and the likelihood of successful DNA amplification. *J Hum Evol* 45:203-17.
  54. Fu Q. et al. (2013) A Revised Timescale for Human Evolution Based on Ancient Mitochondrial Genomes. *Curr Biol* 23:553-9.
  55. Andrews RM et al. (1999) Reanalysis and revision of the Cambridge reference sequence for human mitochondrial DNA. *Nat Genet* 23:147.
  56. Milne I et al. (2013) Using Tablet for visual exploration of second-generation sequencing data. *Brief Bioinf* 14:193-202.
  57. Gelman A, Rubin DB (1992) Inference from Iterative Simulation Using Multiple Sequences. *Statist Sci* 7:457-511.
  58. Plummer M et al. (2006) CODA: Convergence Diagnosis and Output Analysis for MCMC. *R News* 6:7-11.
  59. Skoglund P et al. (2013) Accurate sex identification of ancient human remains using DNA shotgun sequencing. *J Arch Sci* 40:4477-82.
  60. Rasmussen M et al. (2011) An Aboriginal Australian Genome Reveals Separate Human Dispersals into Asia. *Science* 334:94-8.
  61. Rasmussen M et al. (2010) Ancient human genome sequence of an extinct Palaeo-Eskimo. *Nature* 463:757-62.
  62. Kloss-Brandstätter A et al. (2010) HaploGrep: a fast and reliable algorithm for automatic classification of mitochondrial DNA haplogroups. *Hum Mut* 32:25-32.
  63. Cerezo M et al. (2011) New Insights into the Lake Chad Basin Population Structure Revealed by High-Throughput Genotyping of Mitochondrial DNA Coding SNPs. *PLoS ONE* 6:e18682.
  64. Salas A et al. (2002) The making of the African mtDNA landscape. *Am J Hum Genet* 71:1082-111.
  65. Beleza S et al. (2005) The genetic legacy of western Bantu migrations. *Hum Genet* 117:366-375.
  66. Fendt L et al. (2012) MtDNA diversity of Ghana: a forensic and phylogeographic view. *Forensic Sci Int Genet* 6:244-9.
  67. Hünemeier T et al. (2007) Niger-Congo speaking populations and the formation of the Brazilian gene pool: mtDNA and Y-chromosome data. *Am J Phys Anth* 133:854-67.
  68. Jackson BA et al. (2005) Mitochondrial DNA genetic diversity among four ethnic groups in Sierra Leone. *Am J Phys Anth* 128:156-63.
  69. Plaza S et al. (2004) Insights into the western Bantu dispersal: mtDNA lineage analysis in Angola. *Hum Genet* 115:439-47.
  70. Rosa A et al. (2004) MtDNA Profile of West Africa Guineans: Towards a Better Understanding of the Senegambia Region. *Ann Hum Genet* 68:340-52.
  71. Soares P et al. (2012) The Expansion of mtDNA Haplogroup L3 within and out of Africa. *Mol Biol Evol* 29:915-27.
  72. Salas A et al. (2004) The African diaspora: Mitochondrial DNA and the Atlantic slave trade. *Am J Hum Genet* 74:454-65.

73. Salas A et al. (2005) Charting the ancestry of African Americans. *Am J Hum Genet* 77:676-80.
74. Ely B et al. (2006) African-American mitochondrial DNAs often match mtDNAs found in multiple African ethnic groups. *BMC Biol* 4:34.
75. Cruciani F. et al. (2010) Human Y chromosome haplogroup R-V88: a paternal genetic record of early mid Holocene trans-Saharan connections and the spread of Chadic languages. *Eur J Hum Genet* 18:800-7.
76. Rosenberg NA (2006) Standardized subsets of the HGDP-CEPH Human Genome Diversity Cell Line Panel, accounting for atypical and duplicated samples and pairs of close relatives. *Ann Hum Genet* 70:841-7.
77. Skoglund P et al. (2012) Origins and genetic legacy of Neolithic farmers and hunter-gatherers in Europe. *Science* 336:466-9.
78. Purcell S et al. (2007) PLINK: a tool set for whole-genome association and population-based linkage analyses. *Am J Hum Genet* 81:559-75.
79. Bryc K et al. (2010) Genome-wide patterns of population structure and admixture in West Africans and African Americans. *Proc Natl Acad Sci USA* 107:786-91.
80. The International HapMap Consortium (2007) A second generation human haplotype map of over 3.1 million SNPs. *Nature* 449:851-61.
81. The International HapMap 3 Consortium (2010) Integrating common and rare genetic variation in diverse human populations. *Nature* 467:52-8.
82. Durand EY et al. (2011) Testing for ancient admixture between closely related populations. *Mol Biol Evol* 28:2239-52.
83. Patterson N et al. (2006) Population structure and eigenanalysis. *PLoS Genet* 2:e190.
84. Price AL et al. (2006) Principal components analysis corrects for stratification in genome-wide association studies. *Nat Genet* 38:904-9.
85. Pickrell JK, Pritchard JK (2012) Inference of Population Splits and Mixtures from Genome-Wide Allele Frequency Data. *PLoS Genet* 8:e1002967.
86. Alexander DH et al. (2009) Fast model-based estimation of ancestry in unrelated individuals. *Genome Res* 19:1655-64.
87. Sikora M et al. (2014) Population genomic analysis of ancient and modern genomes yields new insights into the genetic ancestry of the Tyrolean Iceman and the genetic structure of Europe. *PLoS Genet* 10:e1004353.
